# Supplementary material for: ECLand: The ECMWF Land Surface Modelling System
Source: Preprints.org preprint supplement (doi:10.20944/preprints202104.0486.v1), 2021-04-19

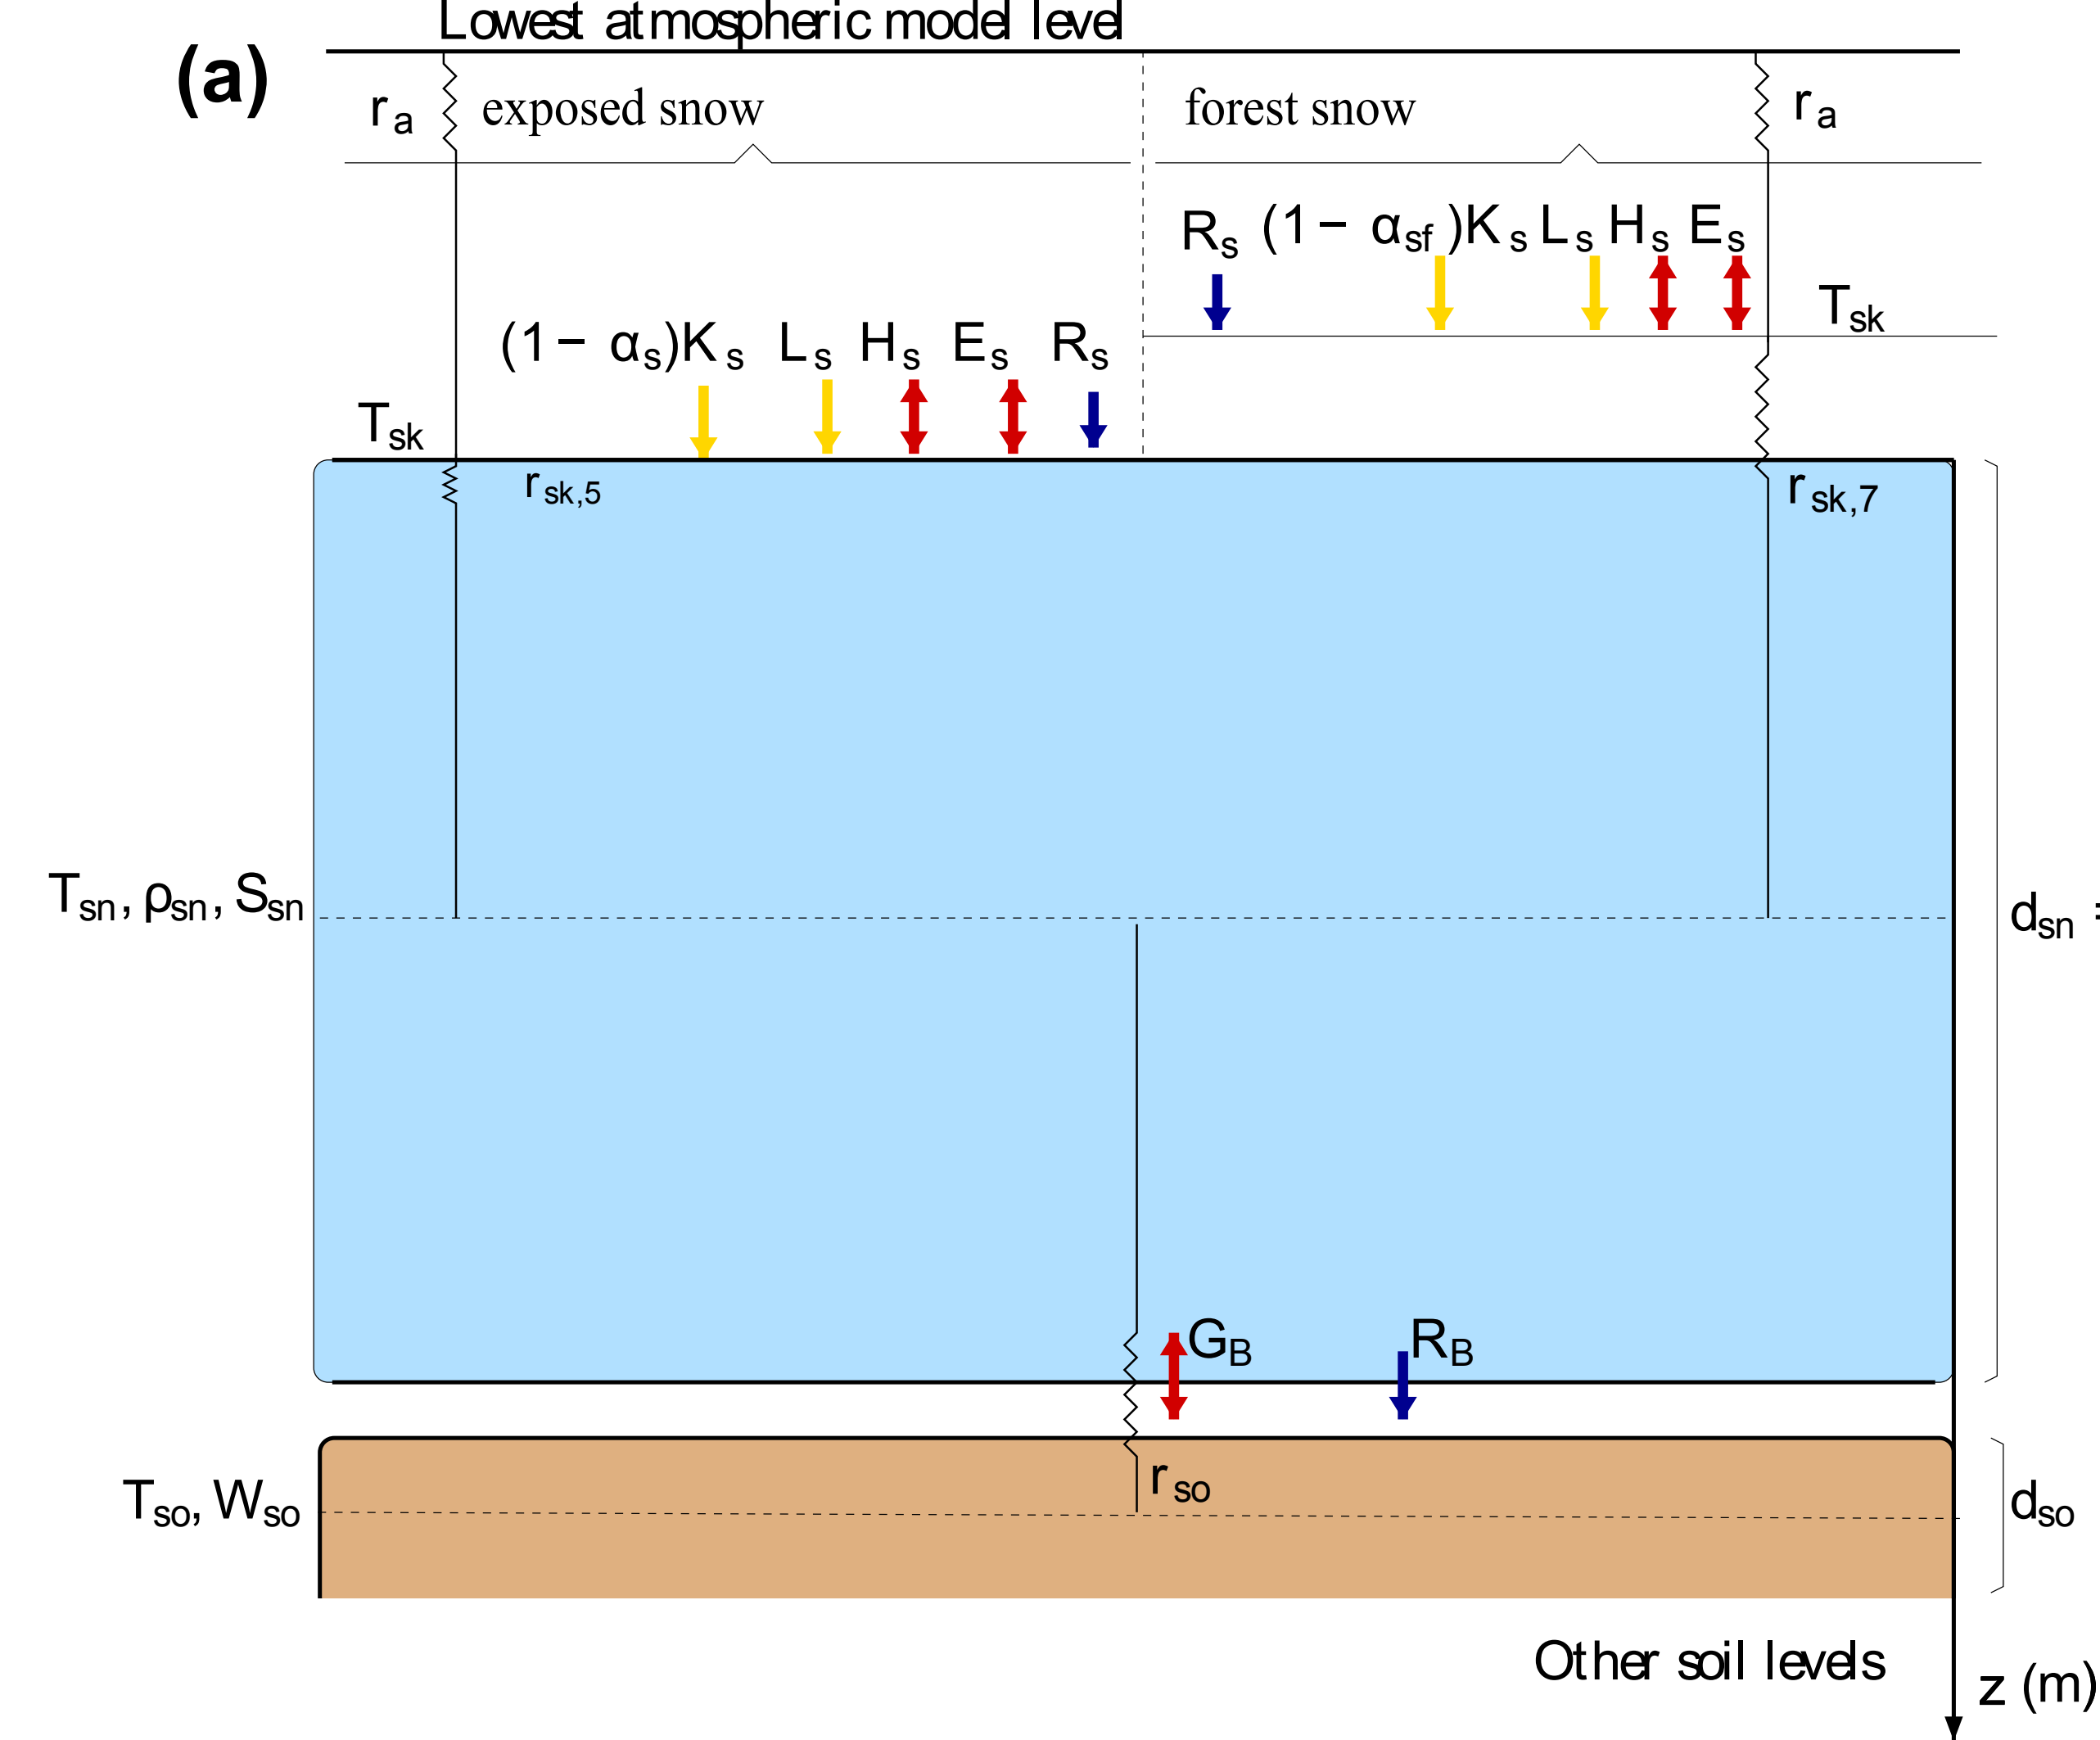

| Symbol        | Parameter                                                            |
|---------------|----------------------------------------------------------------------|
| $r_a$         | Aerodynamic resistance                                               |
| $r_{sk,5}$    | Conductive resistance of exposed snow                                |
| $r_{sk,7}$    | Conductive resistance of forest snow                                 |
| $T_{sk}$      | Tiled Skin (radiative) temperature                                   |
| $K_s$         | Tiled surface downward shortwave radiation                           |
| $L_s$         | Tiled surface downward longwave radiation                            |
| $H_s$         | Tiled surface sensible heat flux                                     |
| $E_s$         | Tiled surface latent heat flux                                       |
| $R_s$         | Net (precipitation and evaporation) water flux at the surface        |
| $\alpha_s$    | Albedo of exposed snow                                               |
| $\alpha_{sf}$ | Albedo of forest snow                                                |
| $T_i$         | Temperature of snow layer $i$                                        |
| $\rho_i$      | Density of the snow layer $i$                                        |
| $S_i$         | Mass of frozen water of the snow layer $i$                           |
| $W_i$         | Mass of liquid water of the snow layer $i$                           |
| $d_i$         | Depth of $i$ -layer of the snowpack                                  |
| $K_i$         | Shortwave radiation between the snow layers $i$ and $i + 1$          |
| $G_i$         | Conductive heat flux between between the snow layers $i$ and $i + 1$ |
| $R_i$         | Liquid water flux between the snow layers $i$ and $i + 1$            |
| $G_B$         | Conductive heat flux at the snow-soil interface                      |
| $K_B$         | Shortwave radiation at the snow-soil interface                       |
| $R_B$         | Liquid water flux at the bottom of the snowpack                      |
| $T_{so}$      | Temperature of uppermost soil layer                                  |
| $W_{so}$      | Liquid water of uppermost soil layer                                 |
| $d_{so}$      | Depth of uppermost soil layer                                        |
| $r_{so}$      | Conductive resistance between soil and snow                          |

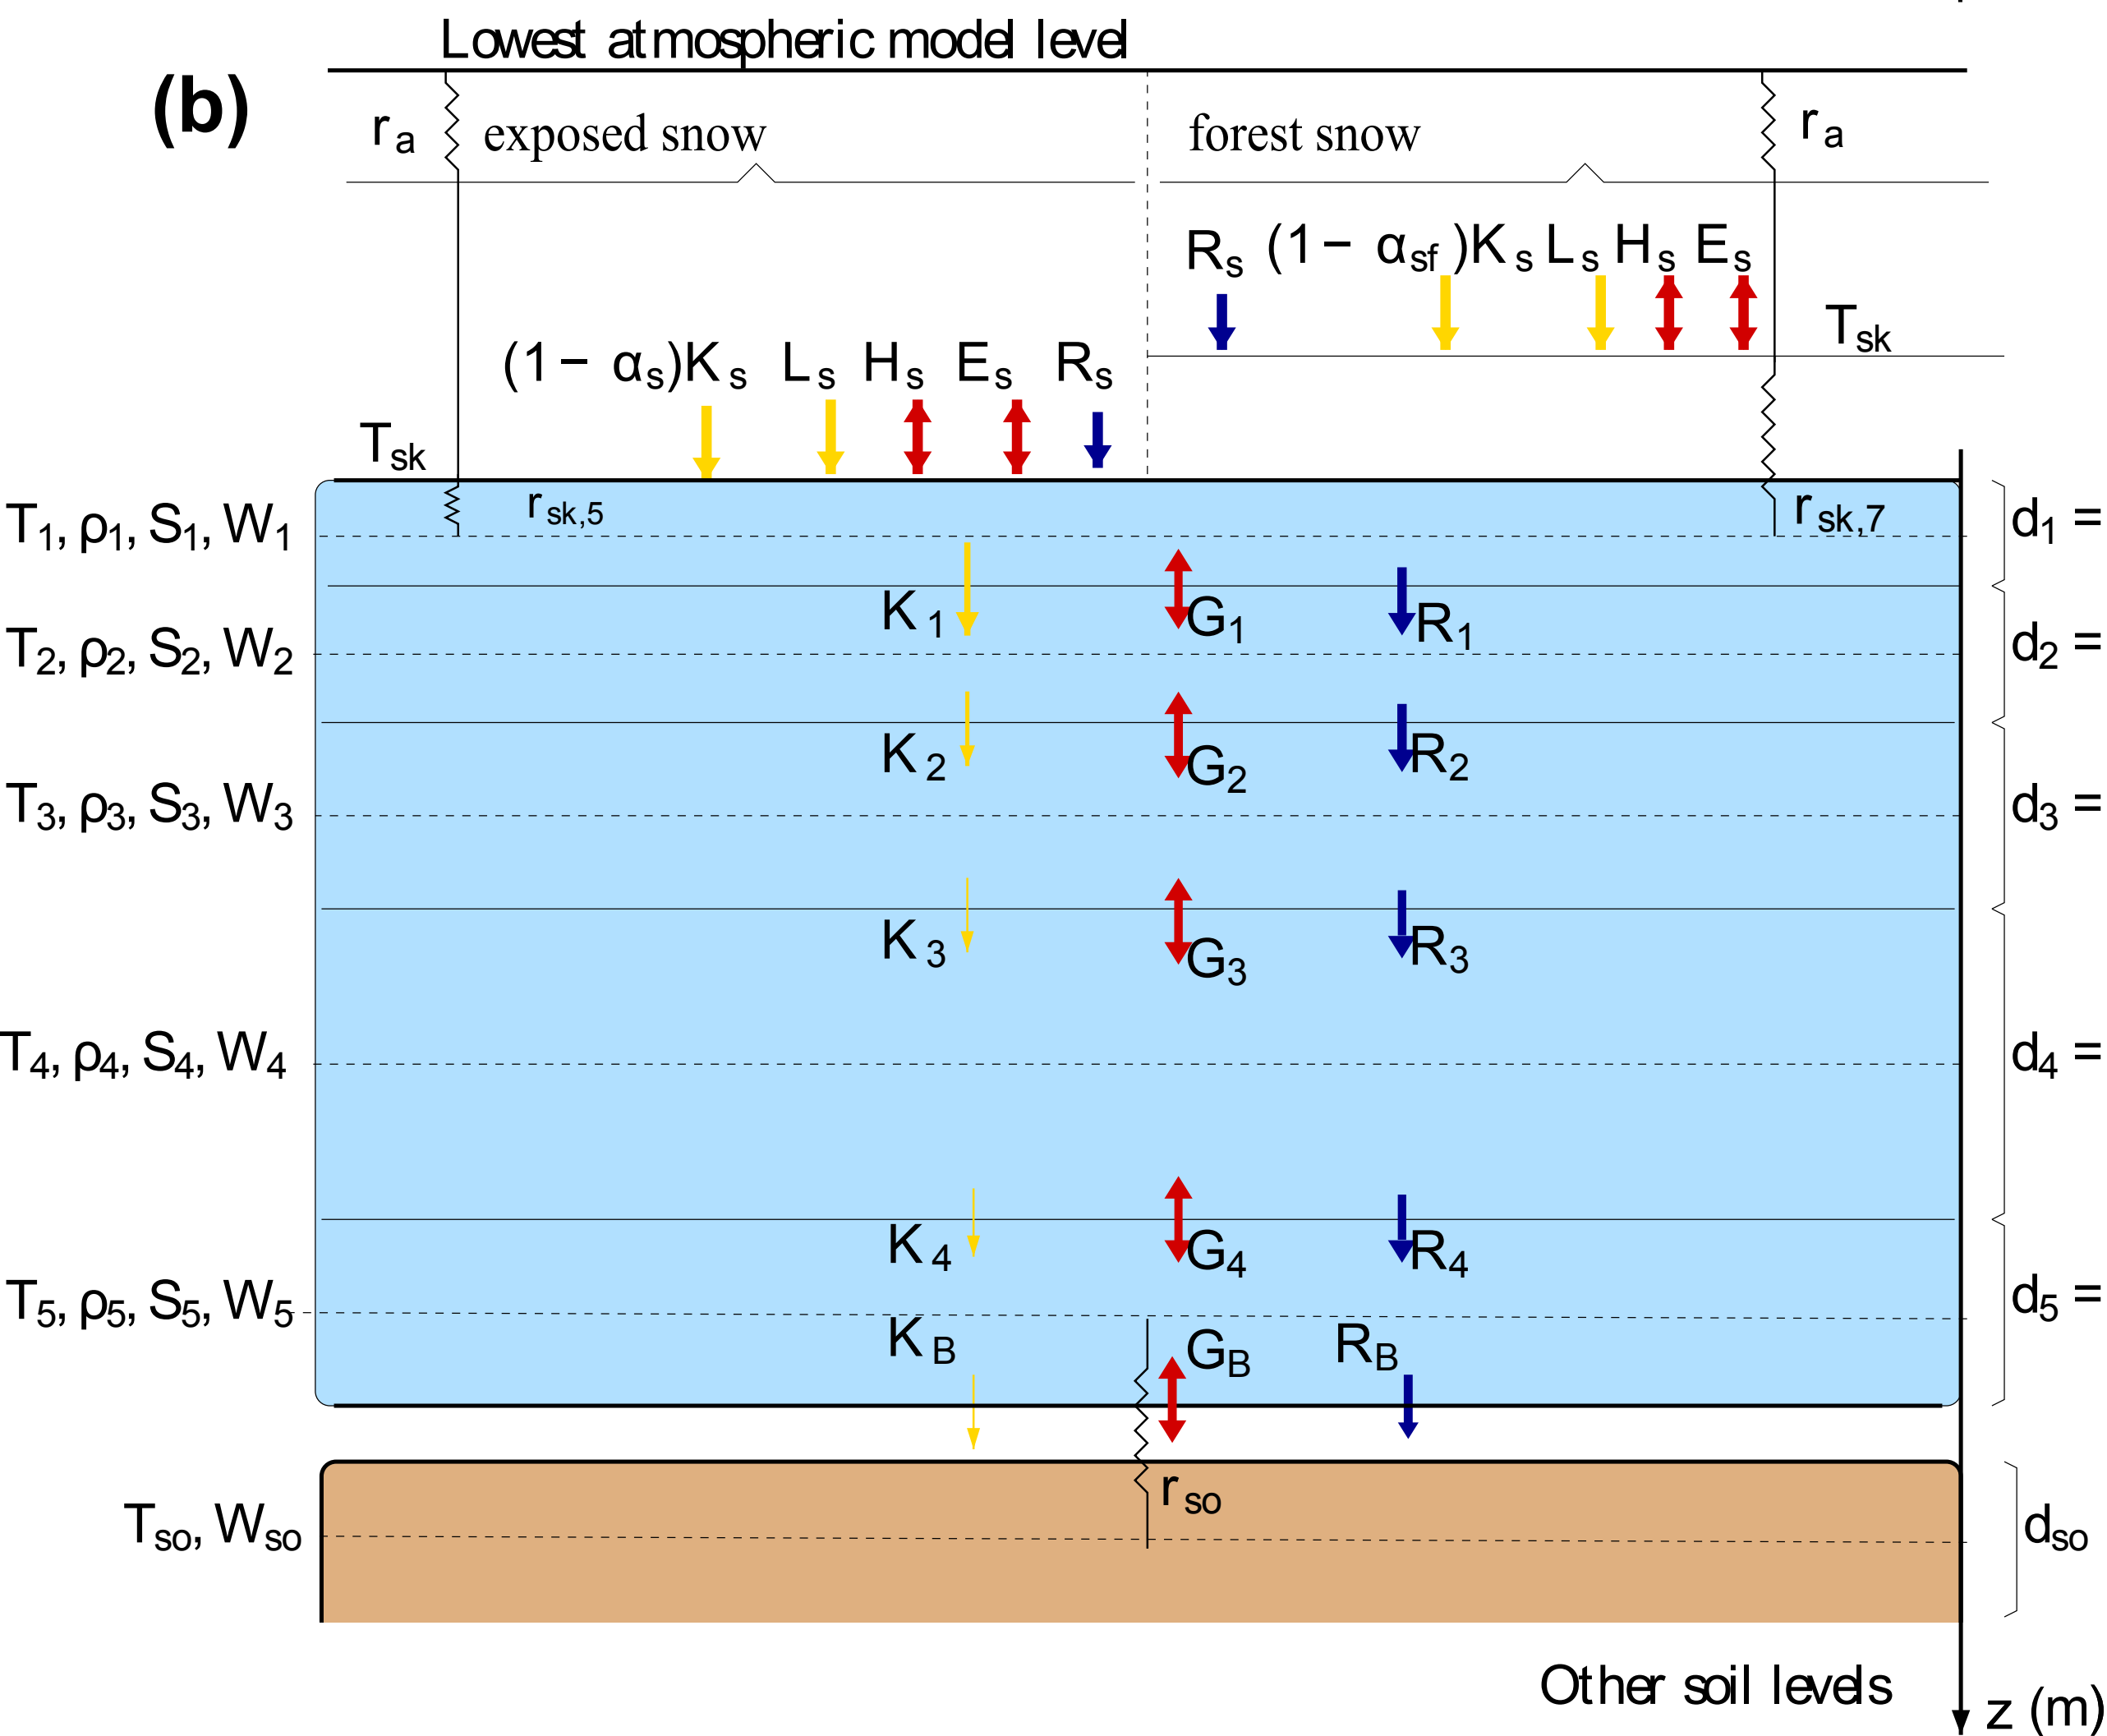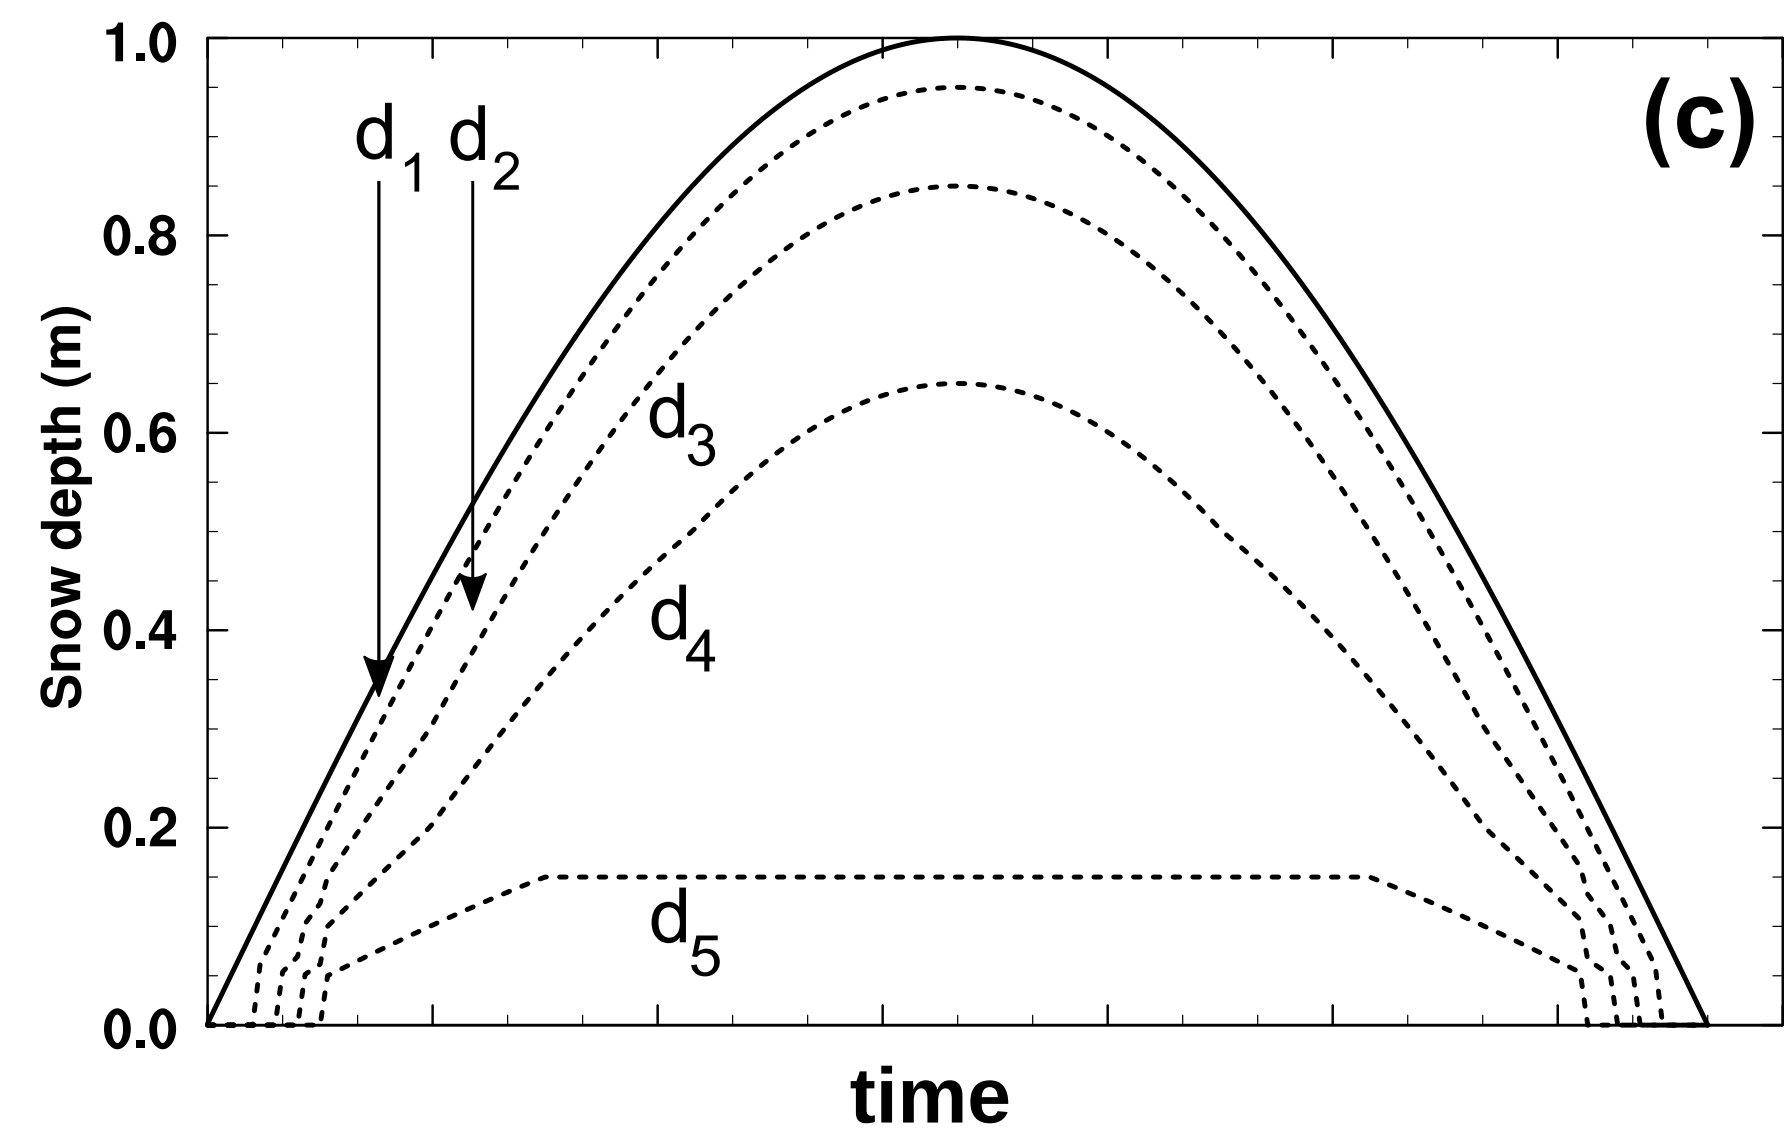

Supplement: Supplementary file 2 [file supplementary]
