# Supplementary material for: ECLand: The ECMWF Land Surface Modelling System
Source: Preprints.org preprint supplement (doi:10.20944/preprints202104.0486.v1), 2021-04-19

a)  $|\text{CTR\_RD}| - |\text{CTR}|$  pbias ET (vs GL3b)

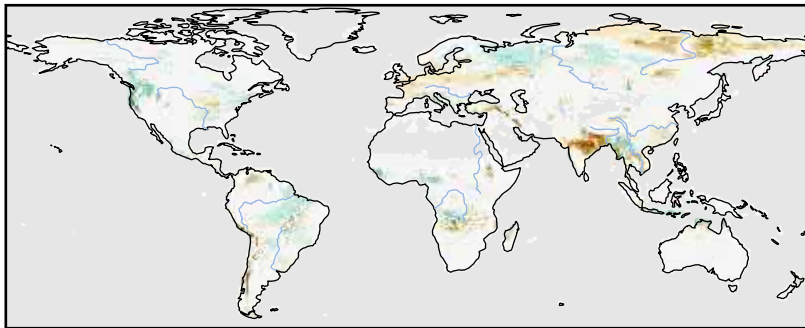

b)  $|\text{CTR\_RD}| - |\text{CTR}|$  pbias ET (vs FCRS)

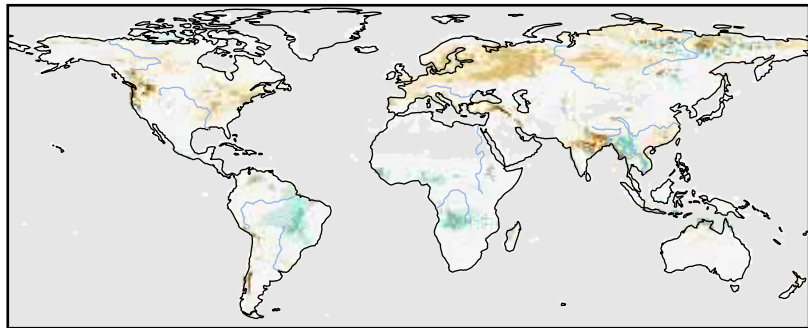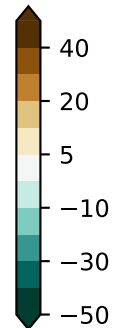

c)  $|\text{CTR\_RS}| - |\text{CTR}|$  pbias ET (vs GL3b)

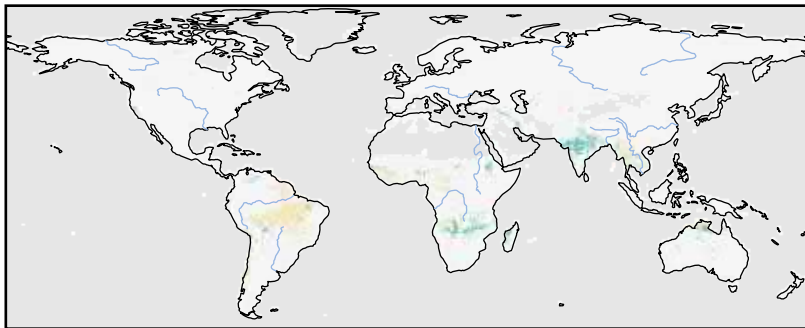

d)  $|\text{CTR\_RS}| - |\text{CTR}|$  pbias ET (vs FCRS)

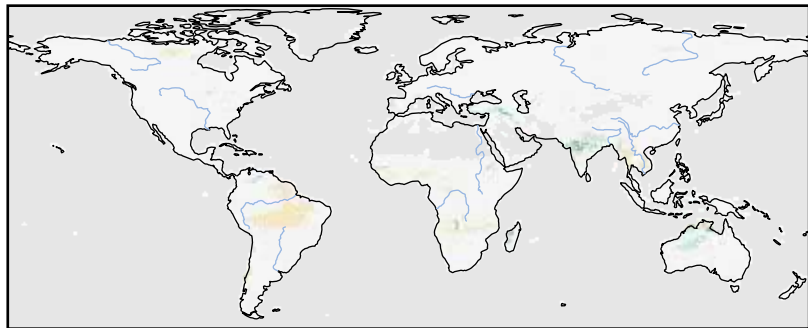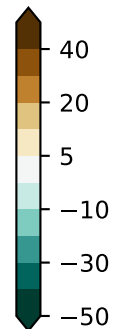

Supplement: Supplementary file 11 [file supplementary]
