# Supplementary material for: ECLand: The ECMWF Land Surface Modelling System
Source: Preprints.org preprint supplement (doi:10.20944/preprints202104.0486.v1), 2021-04-19

a) CTR LST drange bias JJA (K)

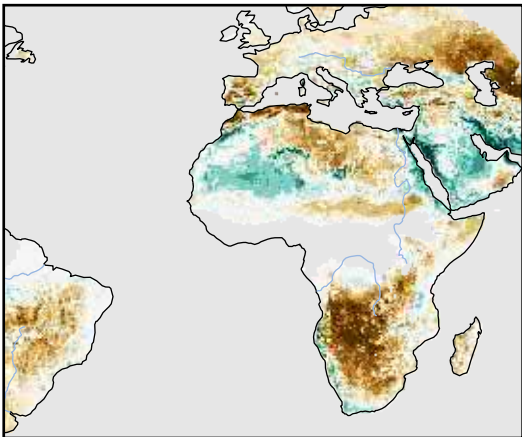

b) CTR LST drange bias SON (K)

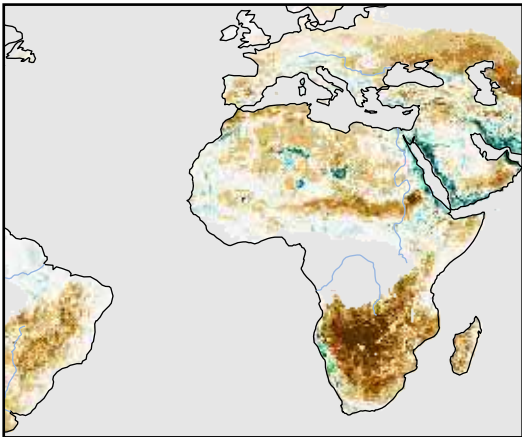

c)  $|CLAI| - |CTR|$  LST drange bias JJA (K)

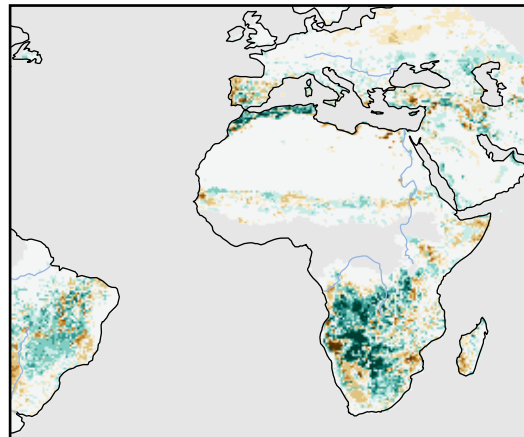

d)  $|CLAI| - |CTR|$  LST drange bias SON (K)

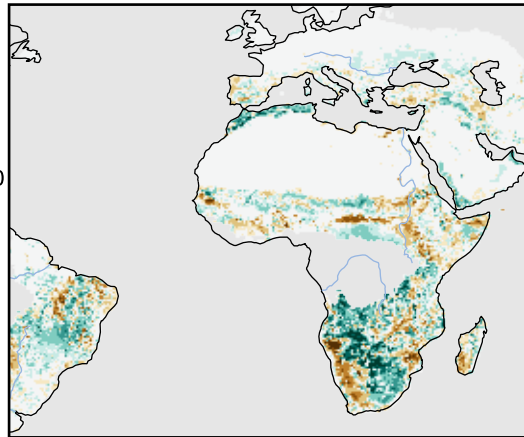

Supplement: Supplementary file 14 [file supplementary]
