# Supplementary figures and images for: ECLand: The ECMWF Land Surface Modelling System
Source: Preprints.org preprint supplement (doi:10.20944/preprints202104.0486.v1), 2021-04-19

a)  $|10L| - |CTR|$  LST drange bias JJA (K)

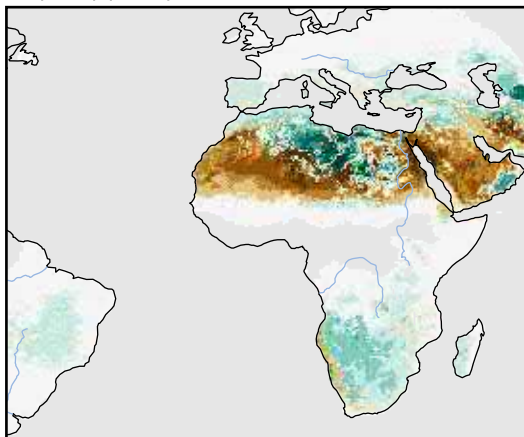

b)  $|10L| - |CTR|$  LST drange bias SON (K)

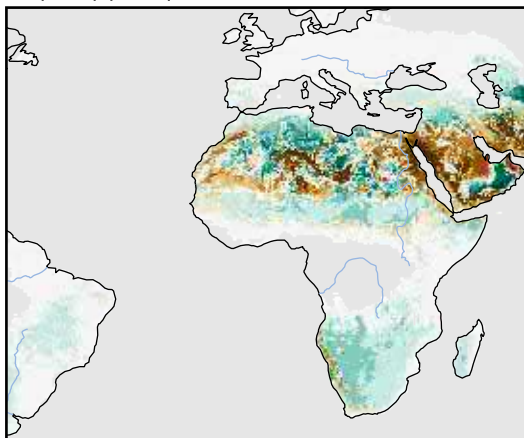

Supplement: Supplementary file 1 [file supplementary]

a) CTR pbias ET (vs GL3b)

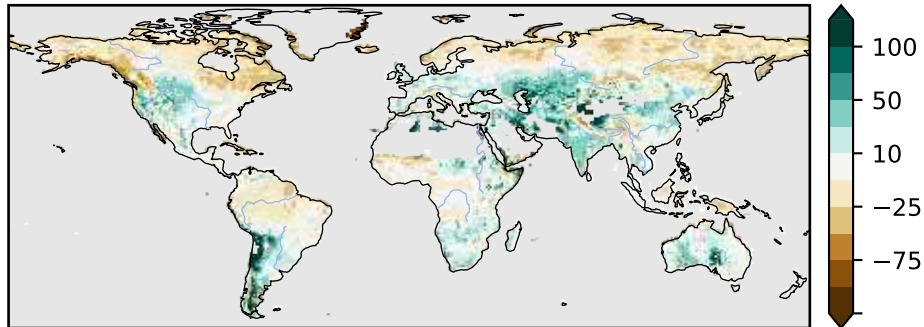

b)  $|CLAI| - |CTR|$  pbias ET (vs GL3b)

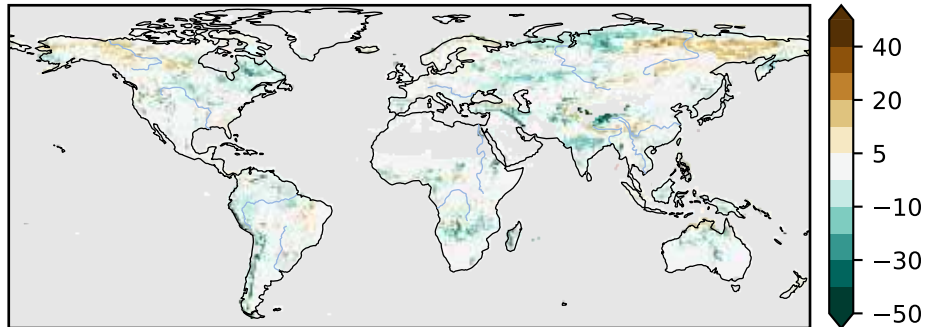

c) CTR pbias ET (vs FCRS)

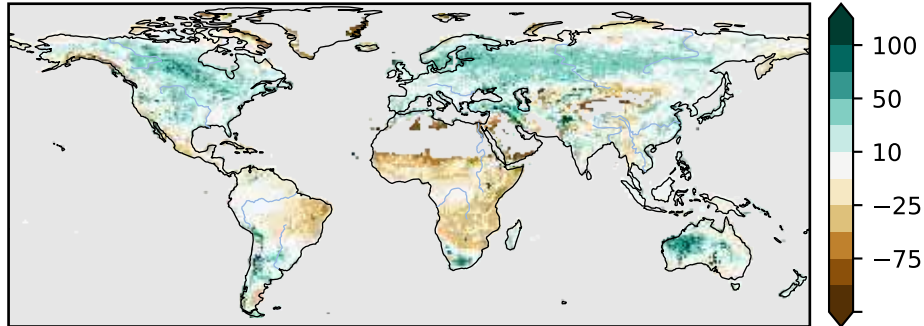

d)  $|CLAI| - |CTR|$  pbias ET (vs FCRS)

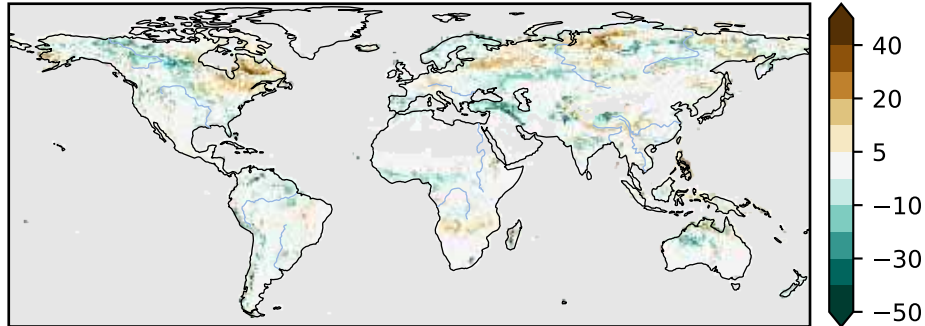

Supplement: Supplementary file 3 [file supplementary]

Lowest model level

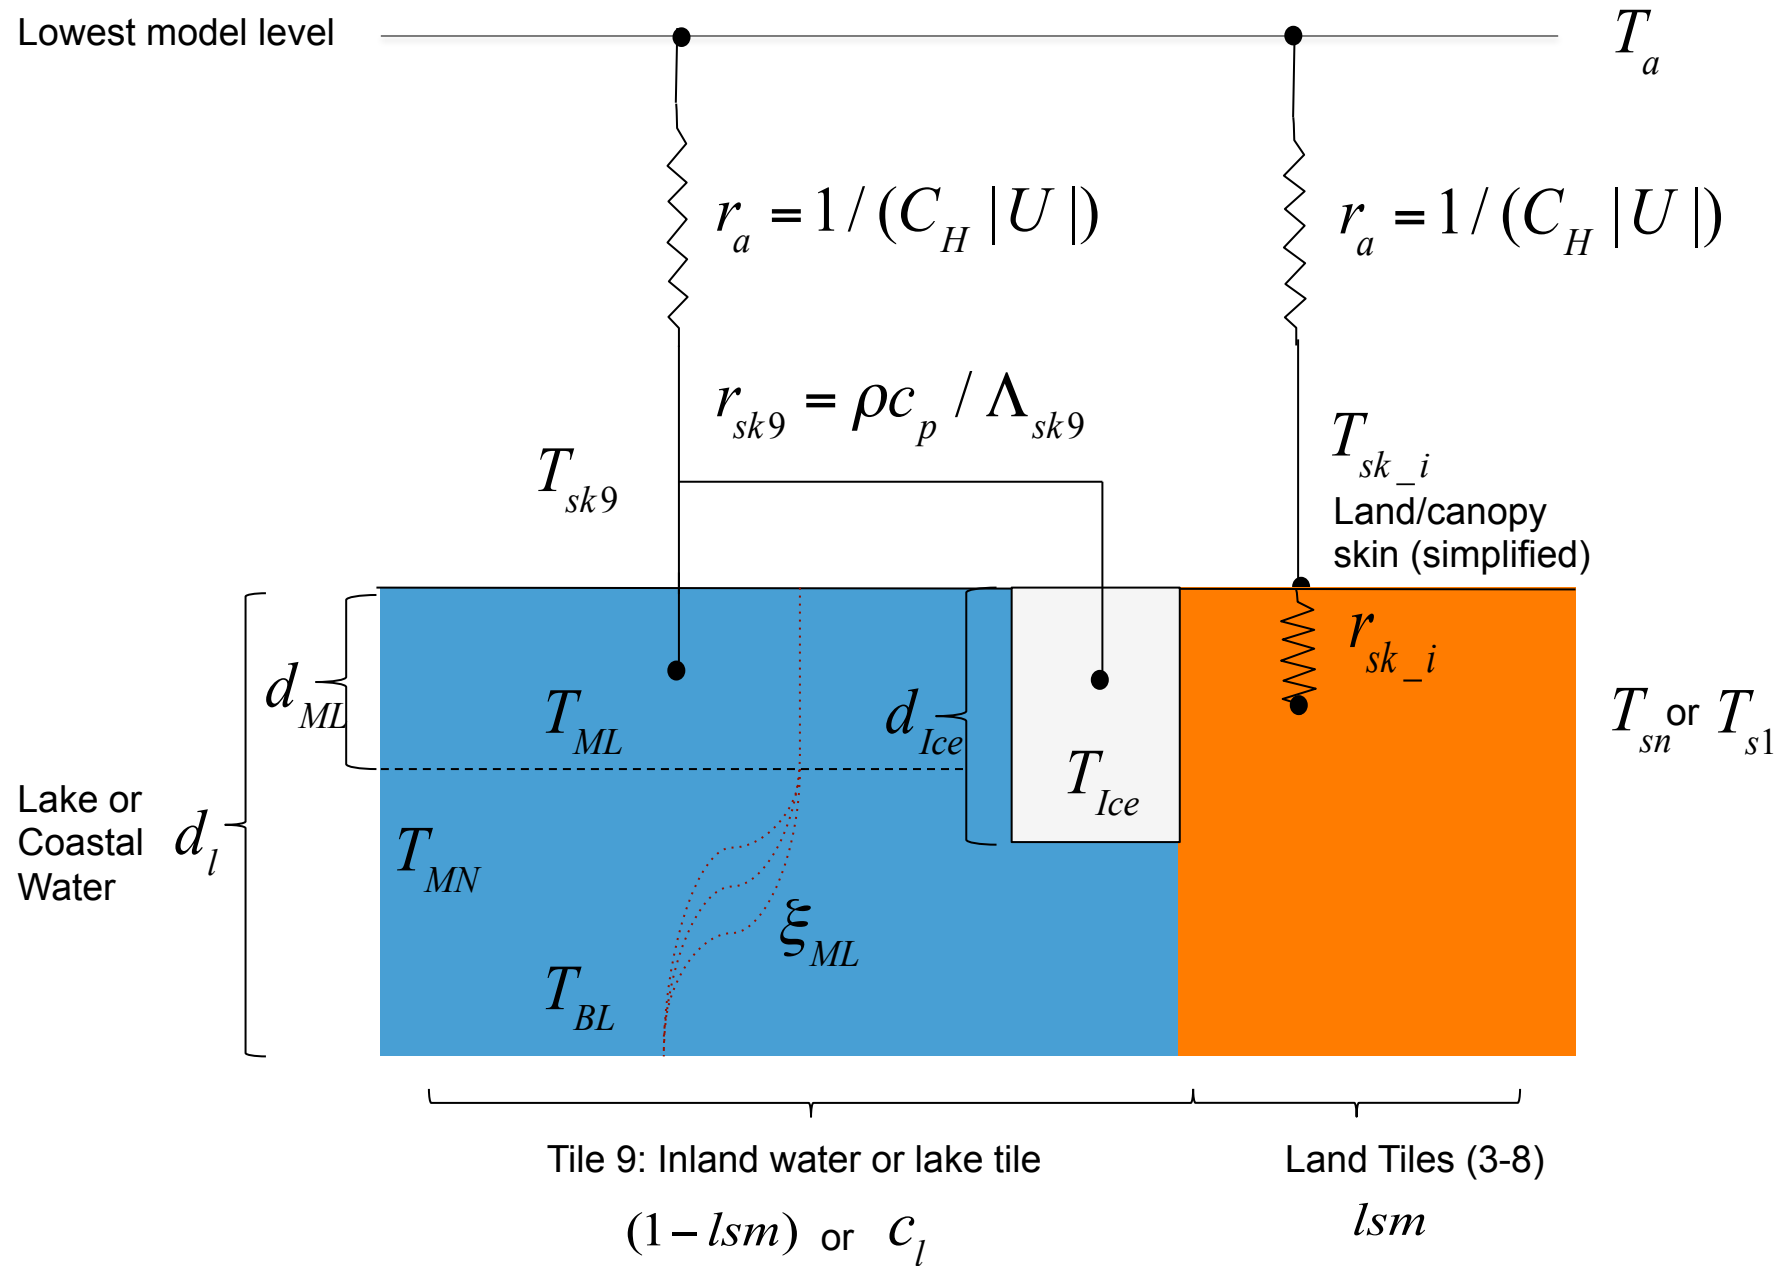

Supplement: Supplementary file 4 [file supplementary]

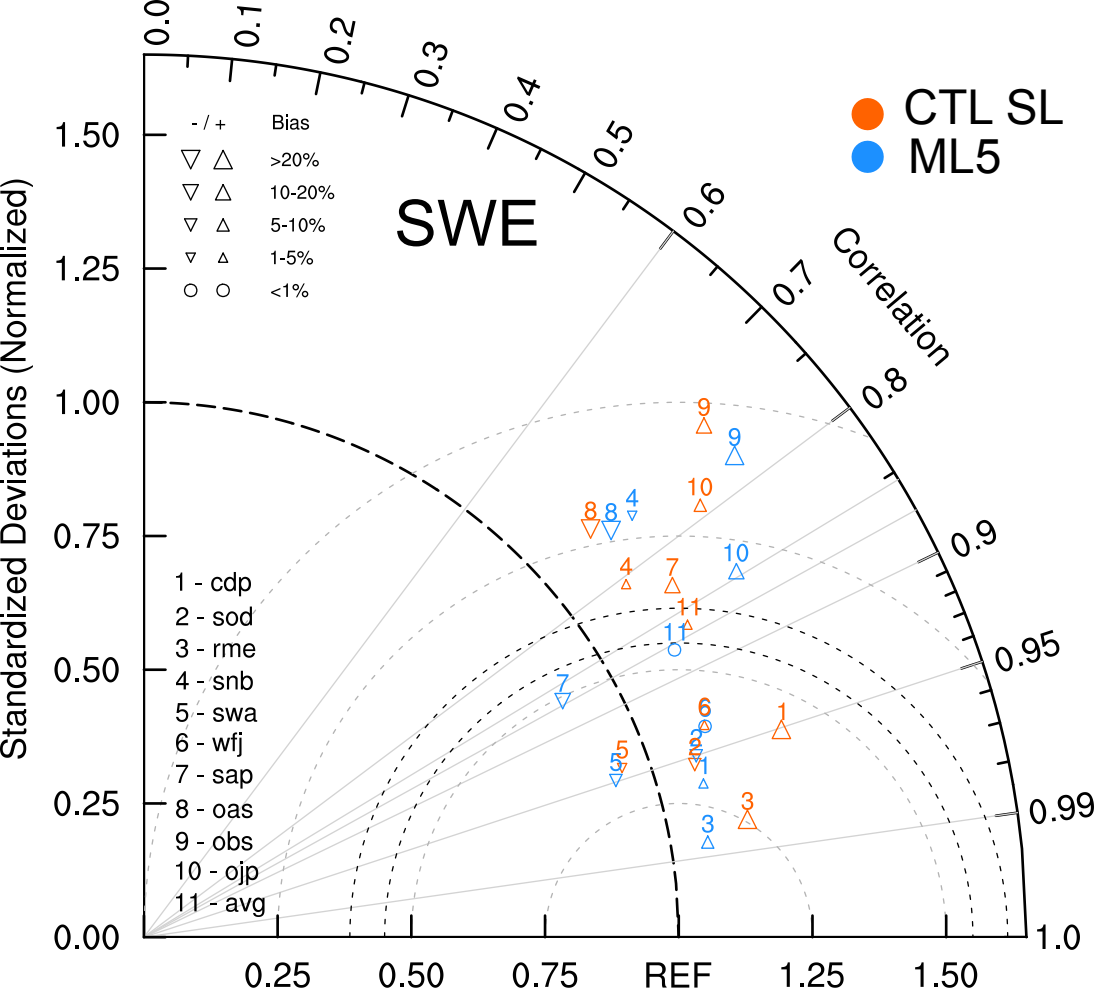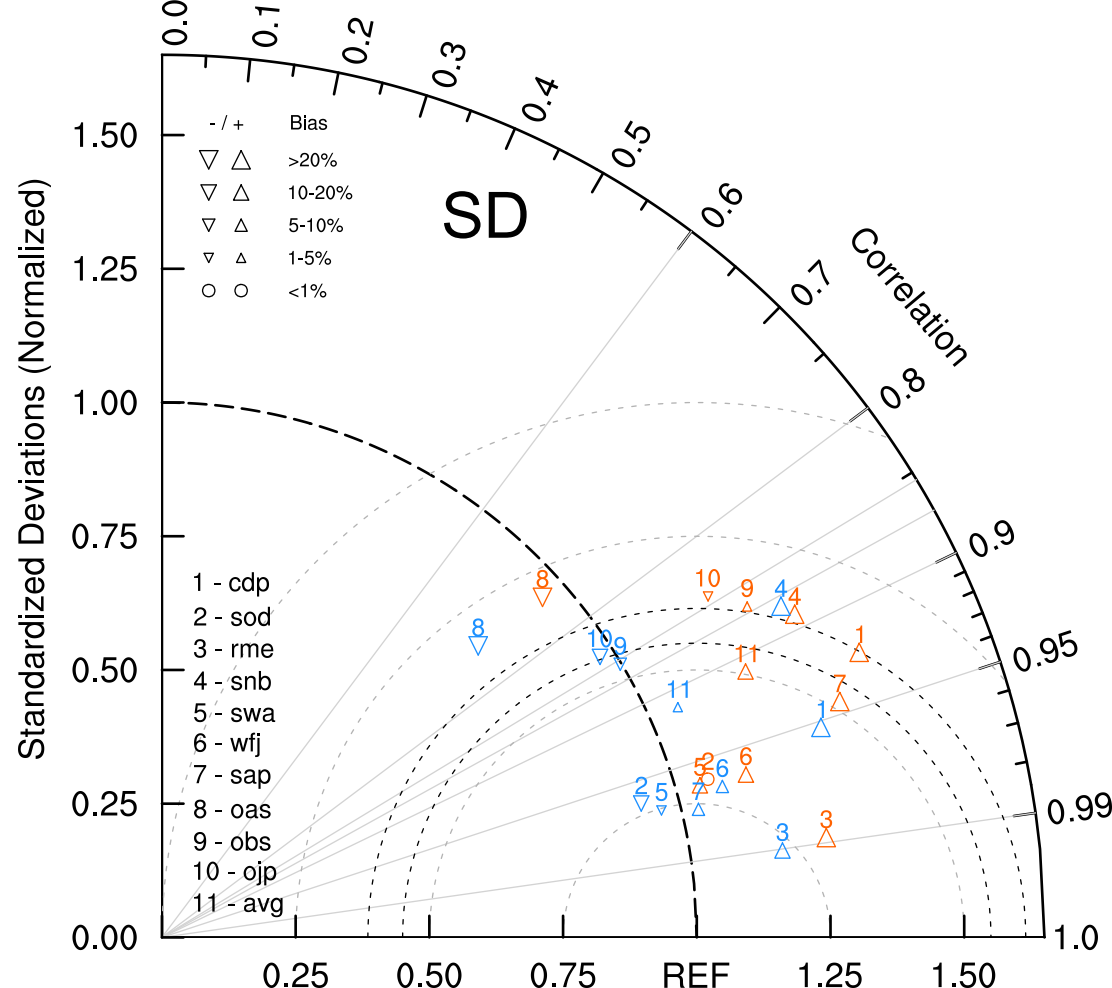

Supplement: Supplementary file 5 [file supplementary]

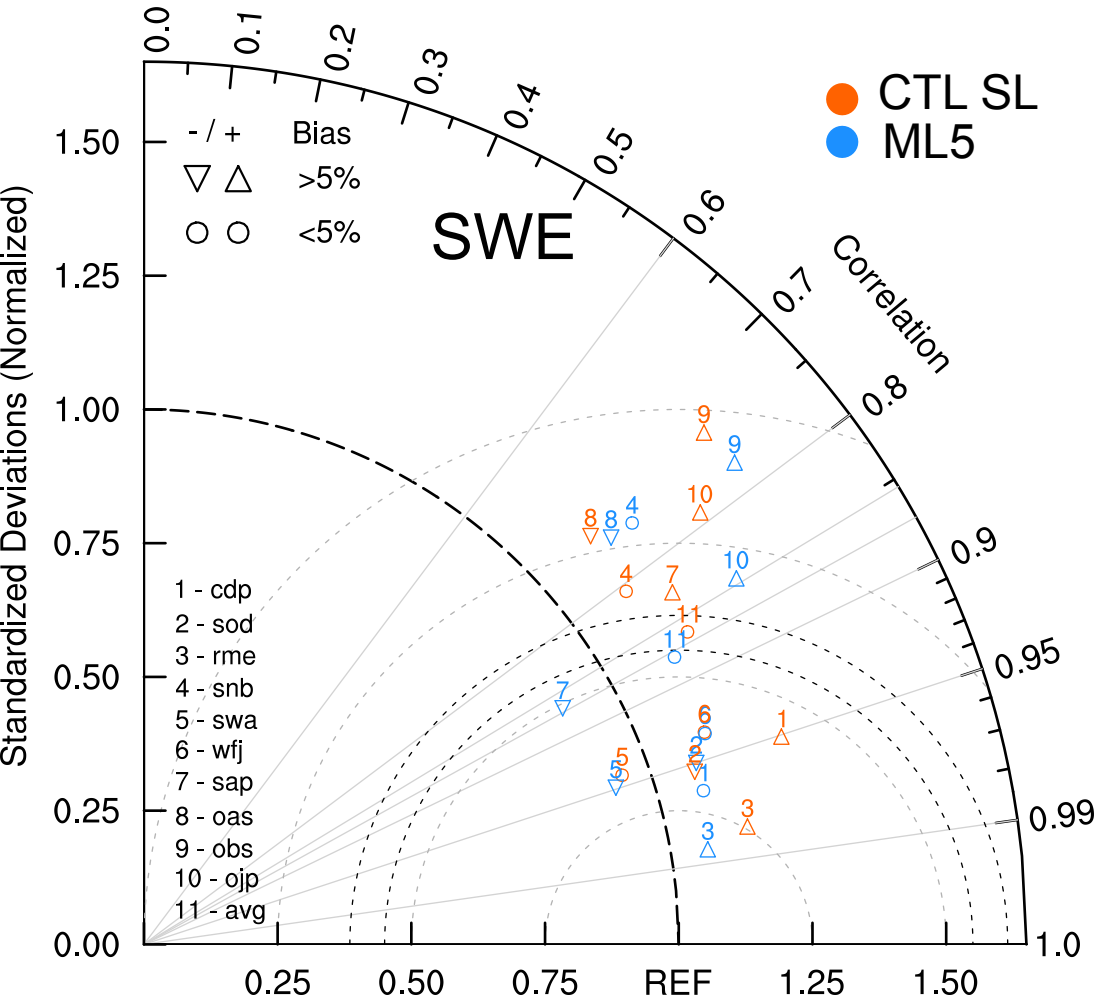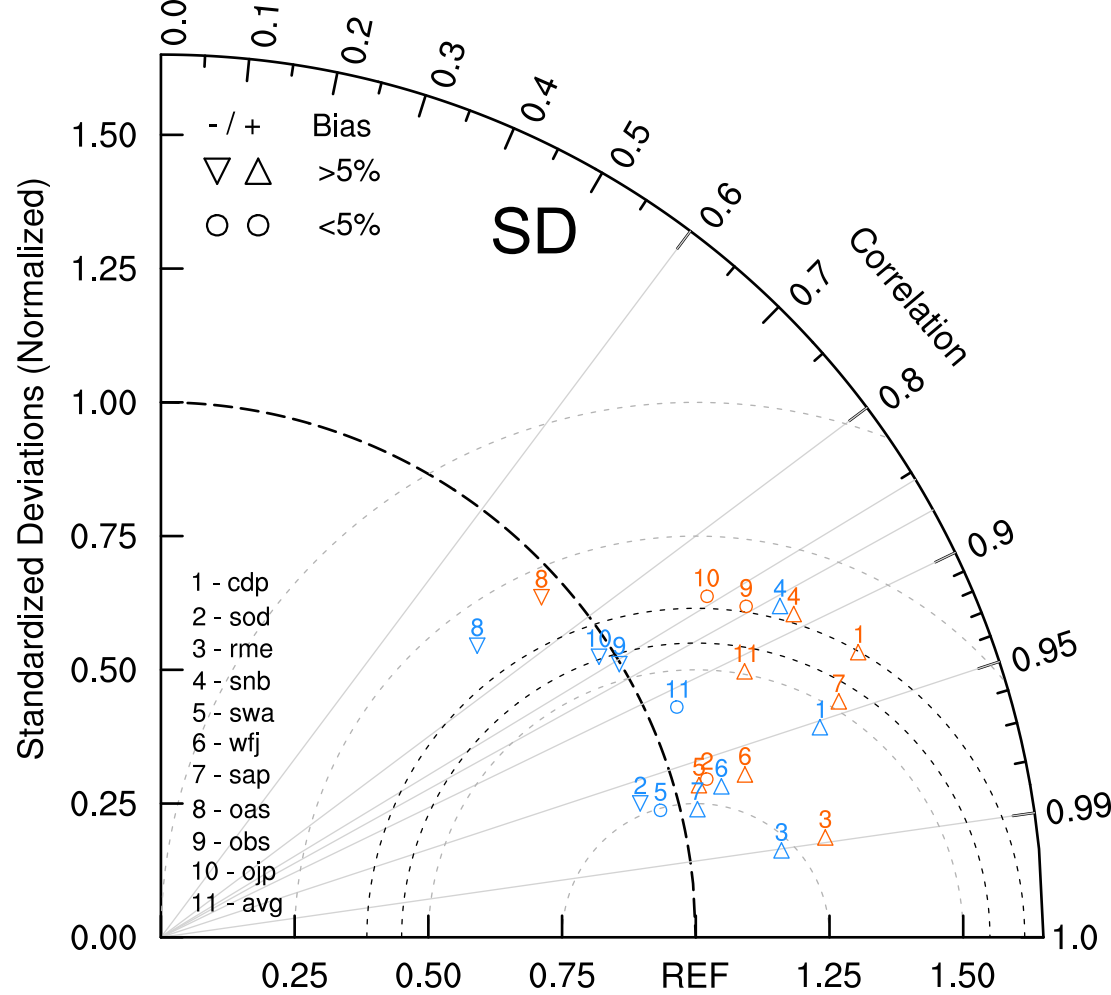

Supplement: Supplementary file 6 [file supplementary]

Lowest model  
level

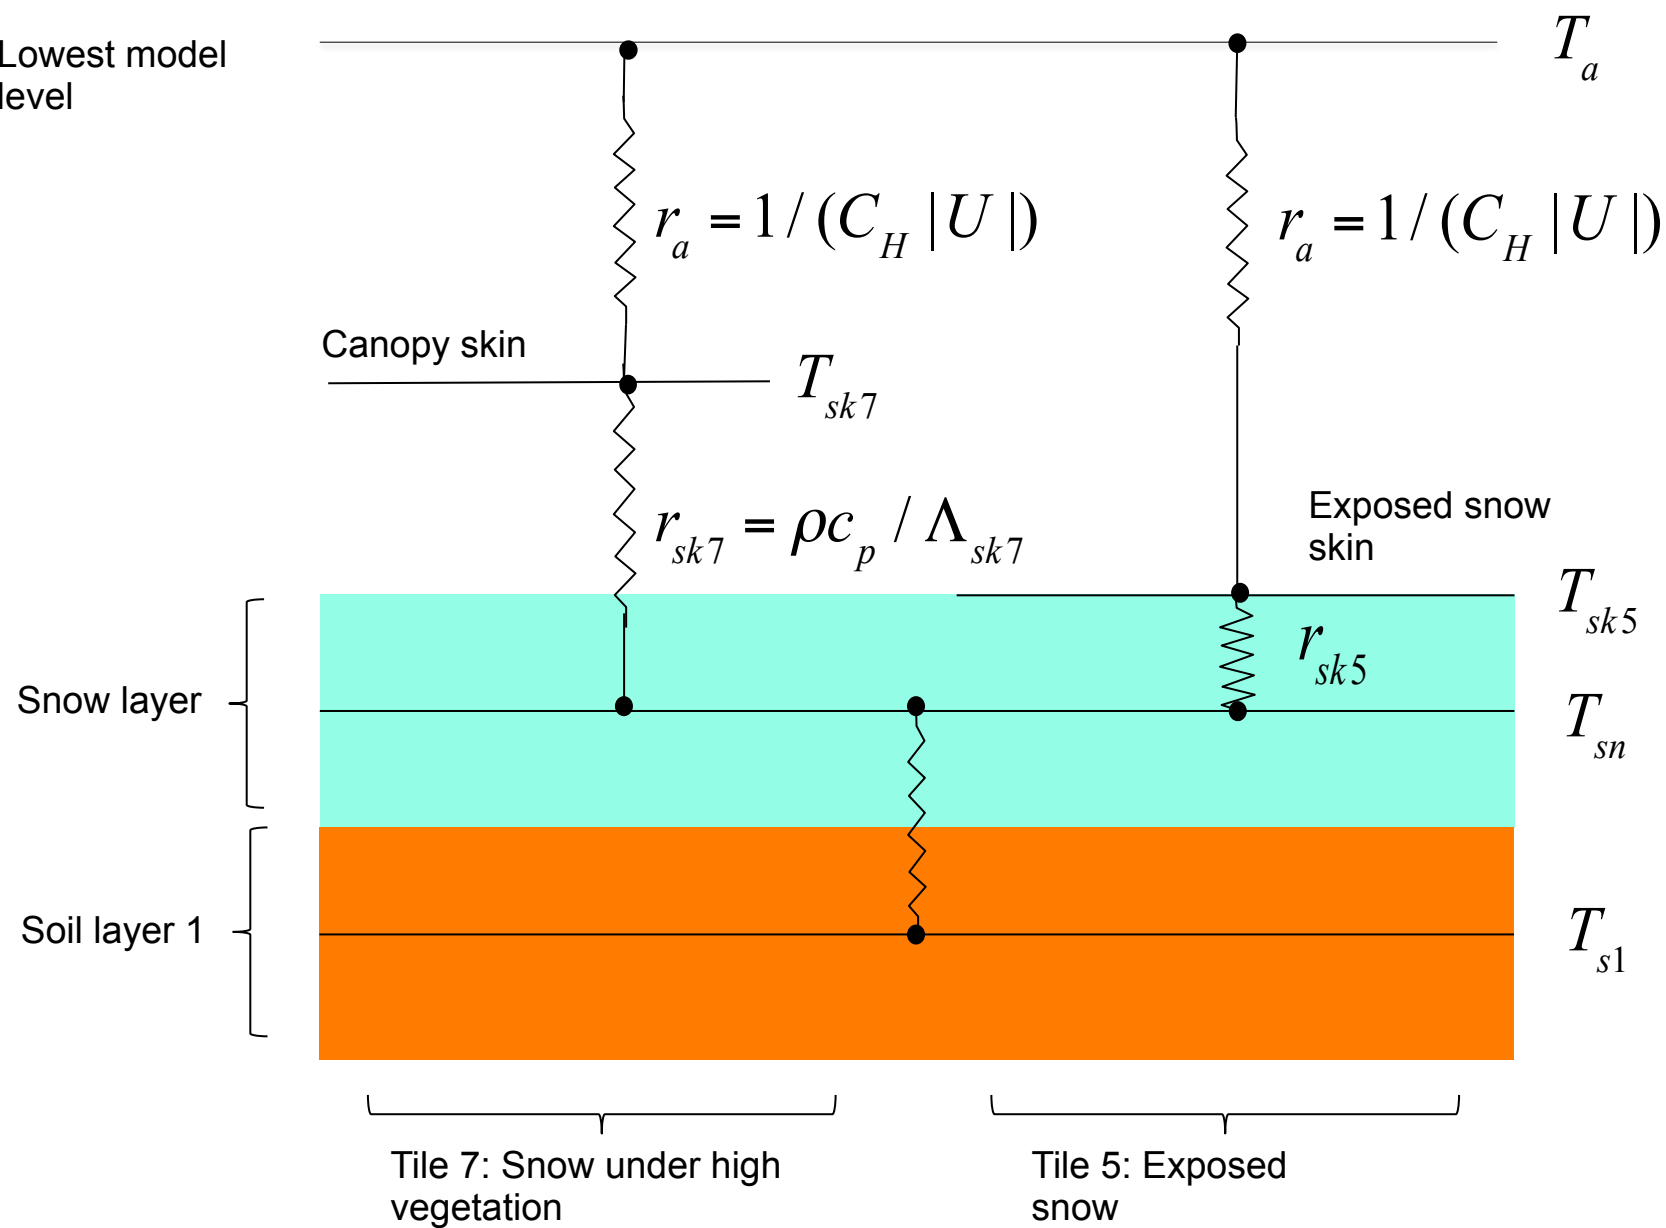

Supplement: Supplementary file 7 [file supplementary]

T2m 00utc t+48 amef [K] (snowML - snowSL)

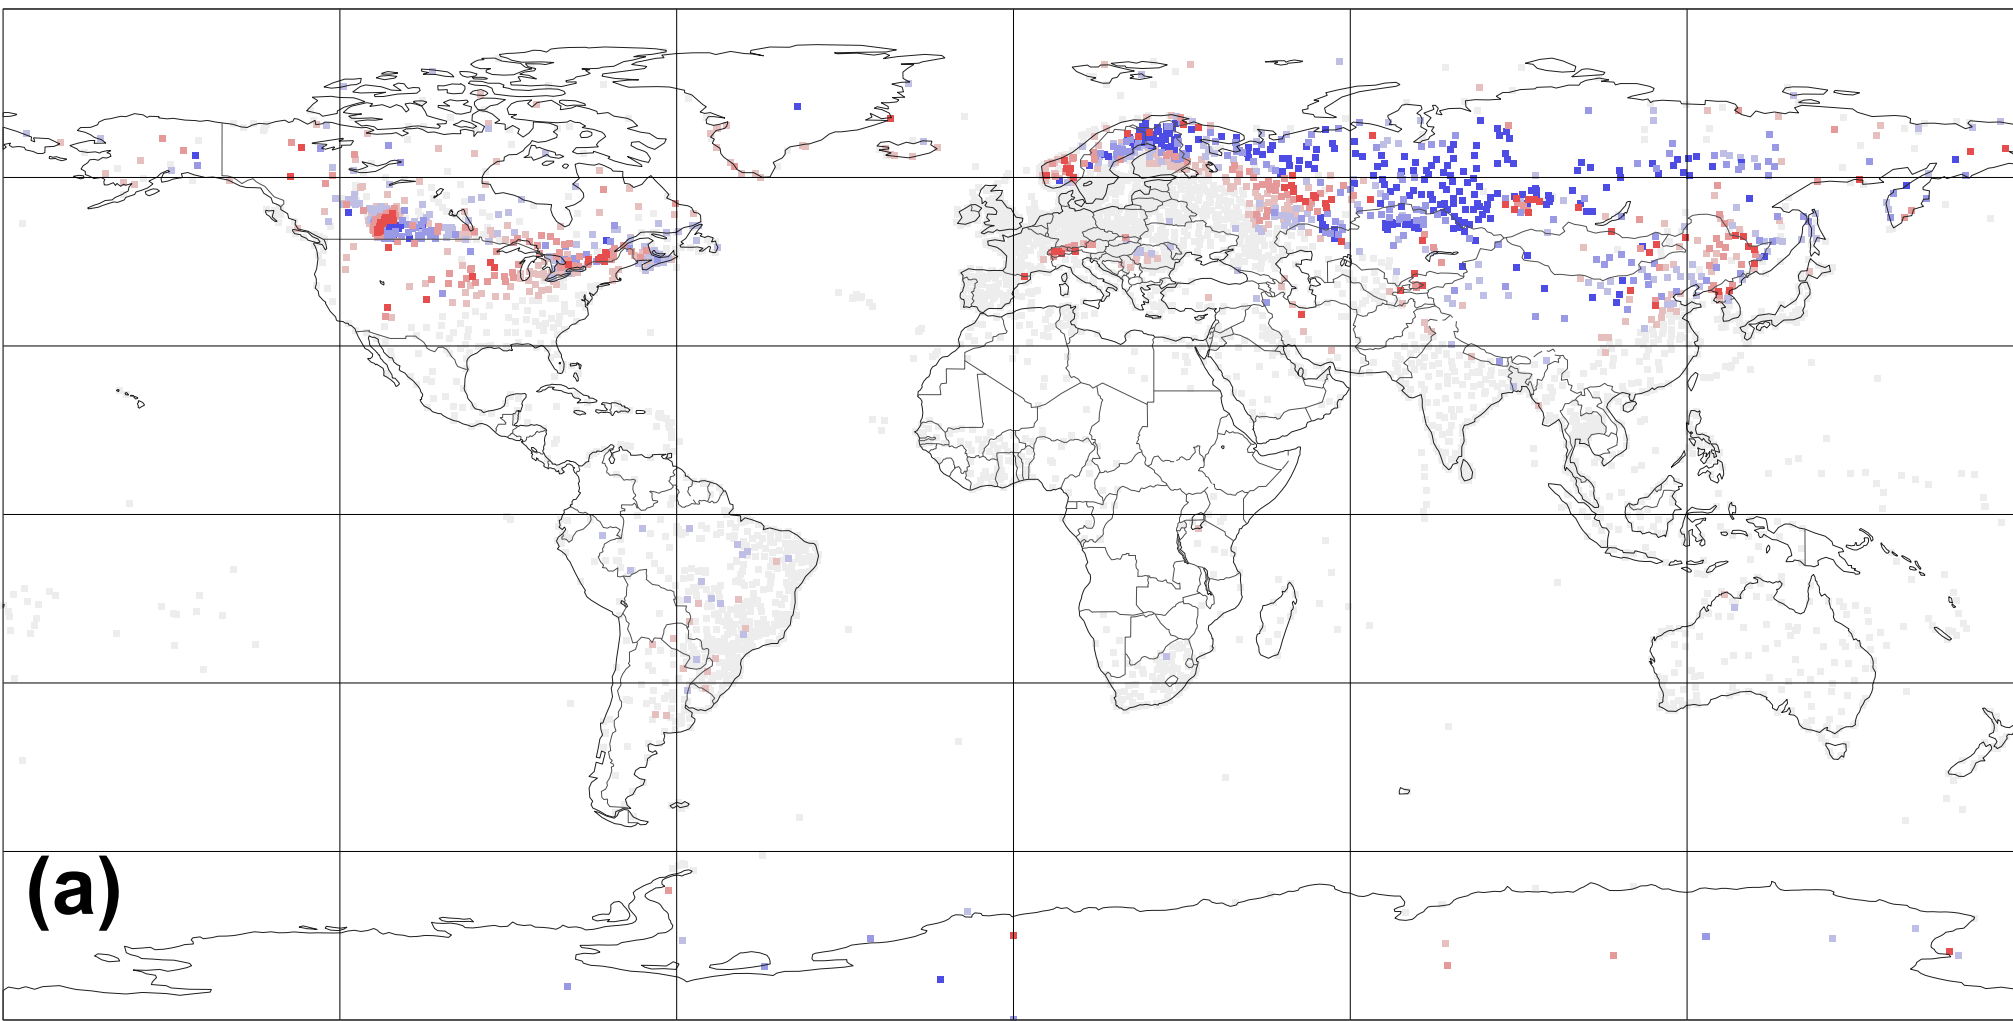

(a)

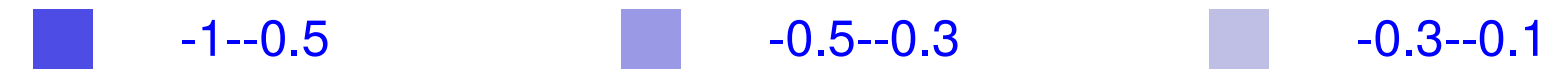

T2m 00utc t+48 rmsef [K] (snowML - snowSL)

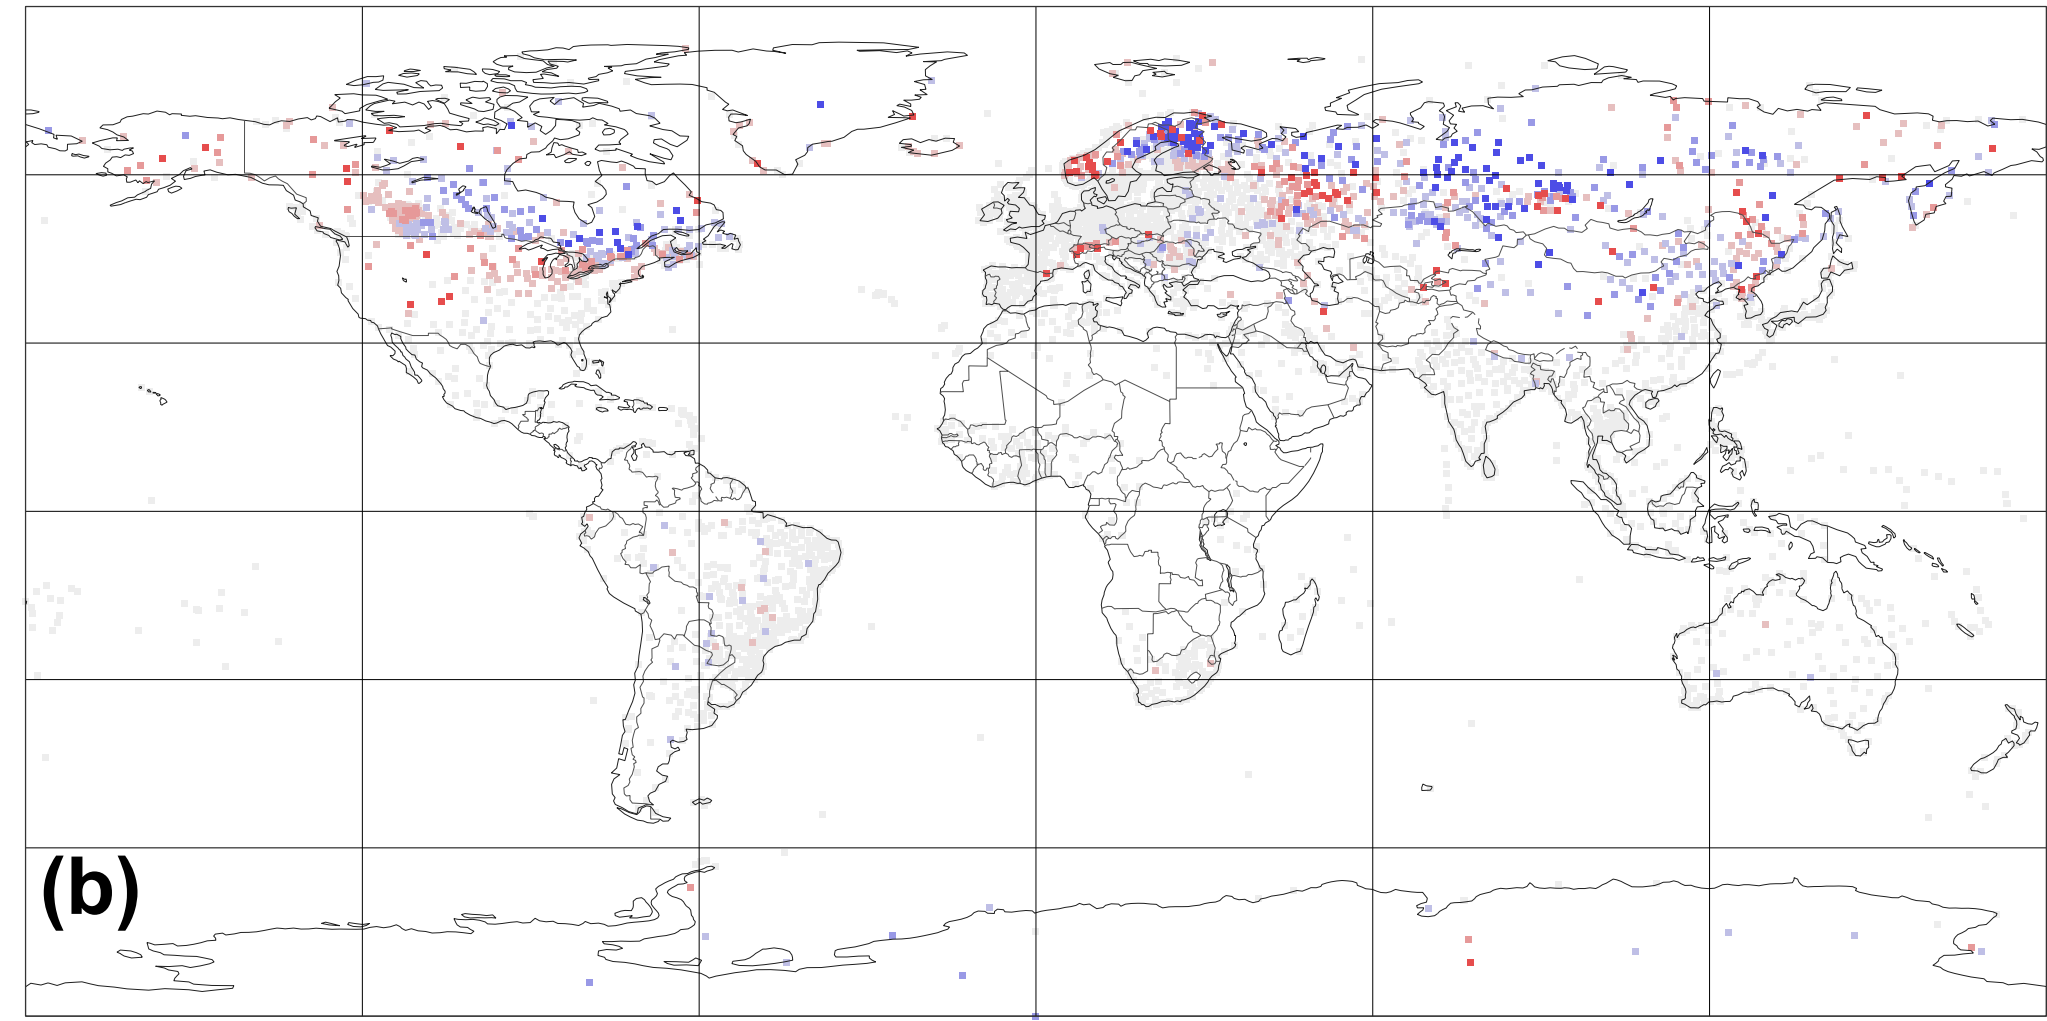

(b)

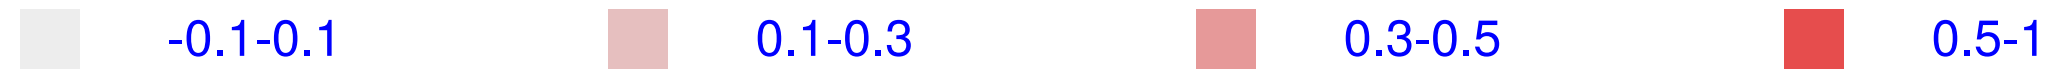

Supplement: Supplementary file 8 [file supplementary]

2t 00utc T+48 amef[K] (snowML - snowSL)

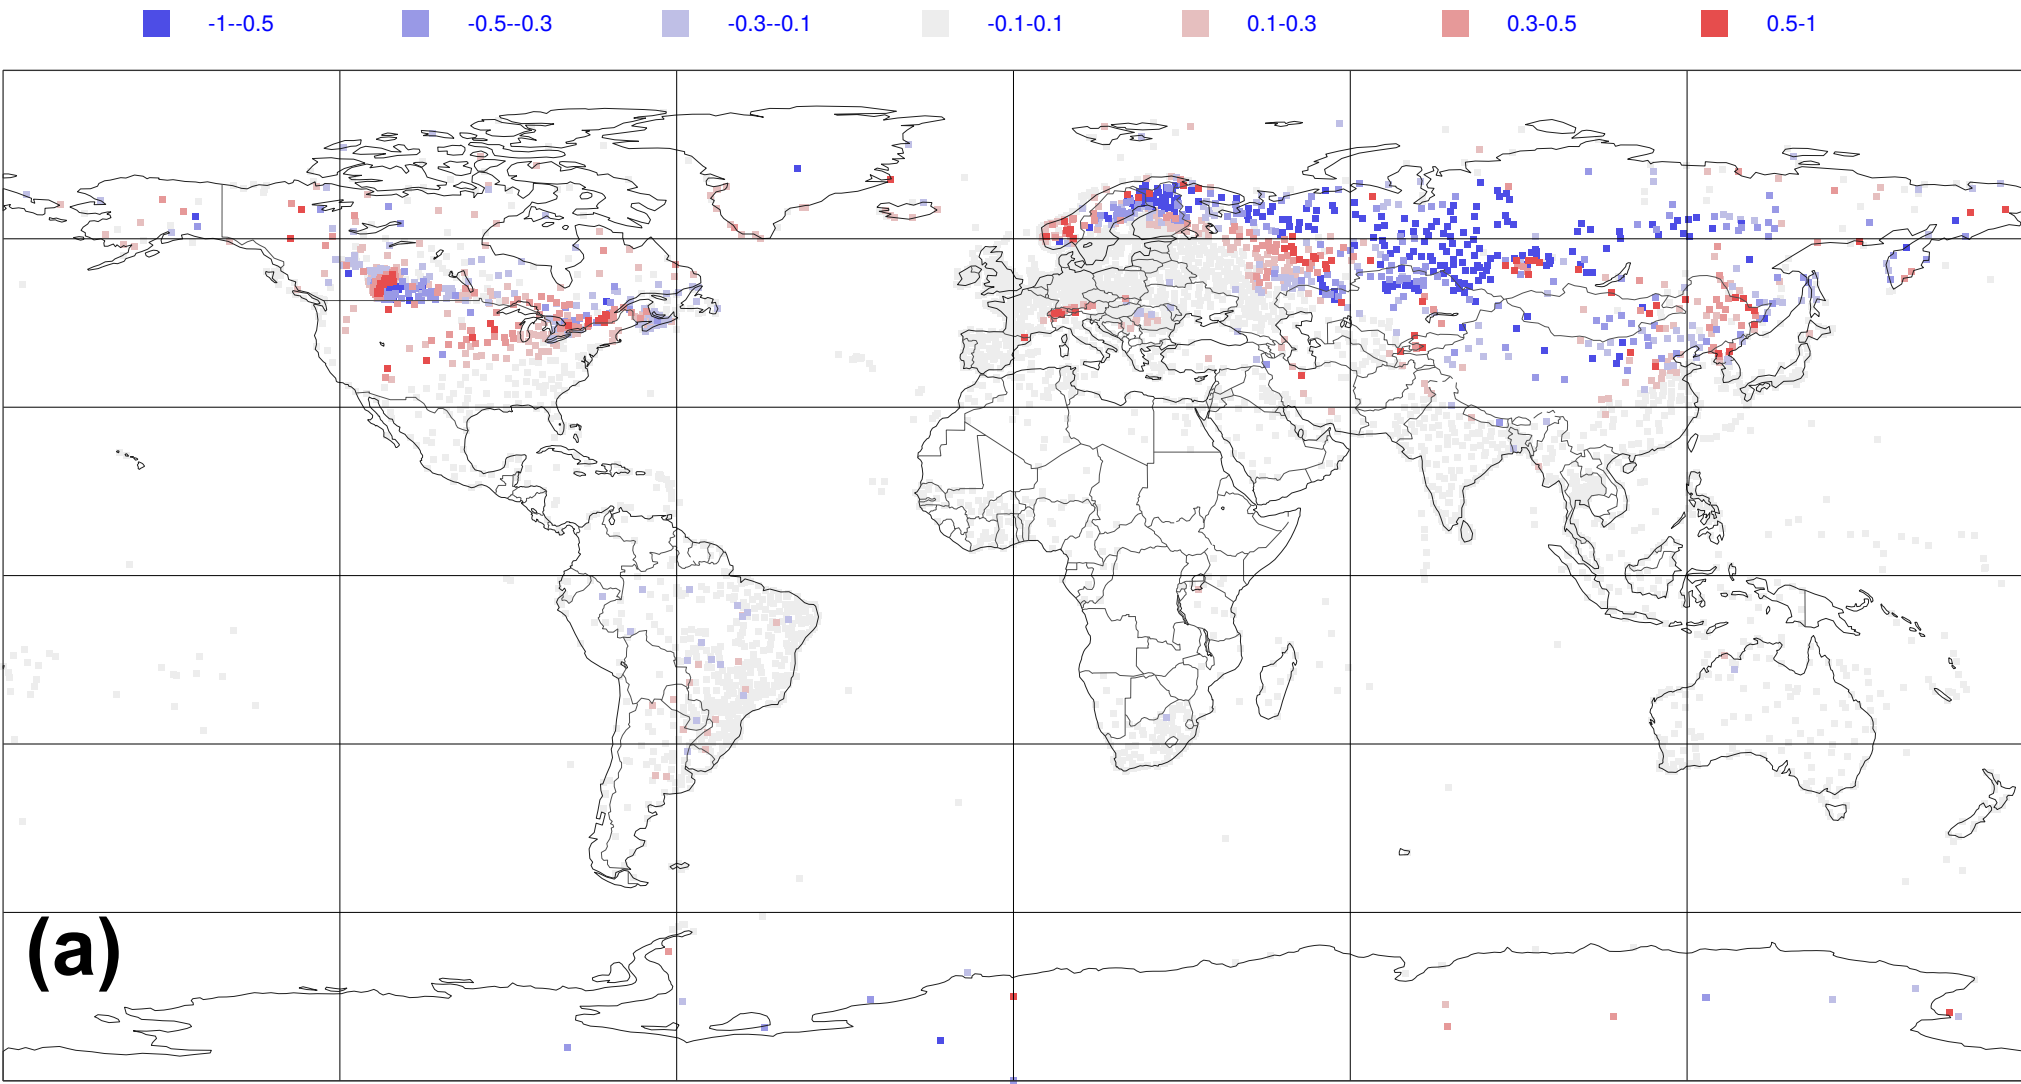

2t 00utc T+48 rmsef[K] (snowML - snowSL)

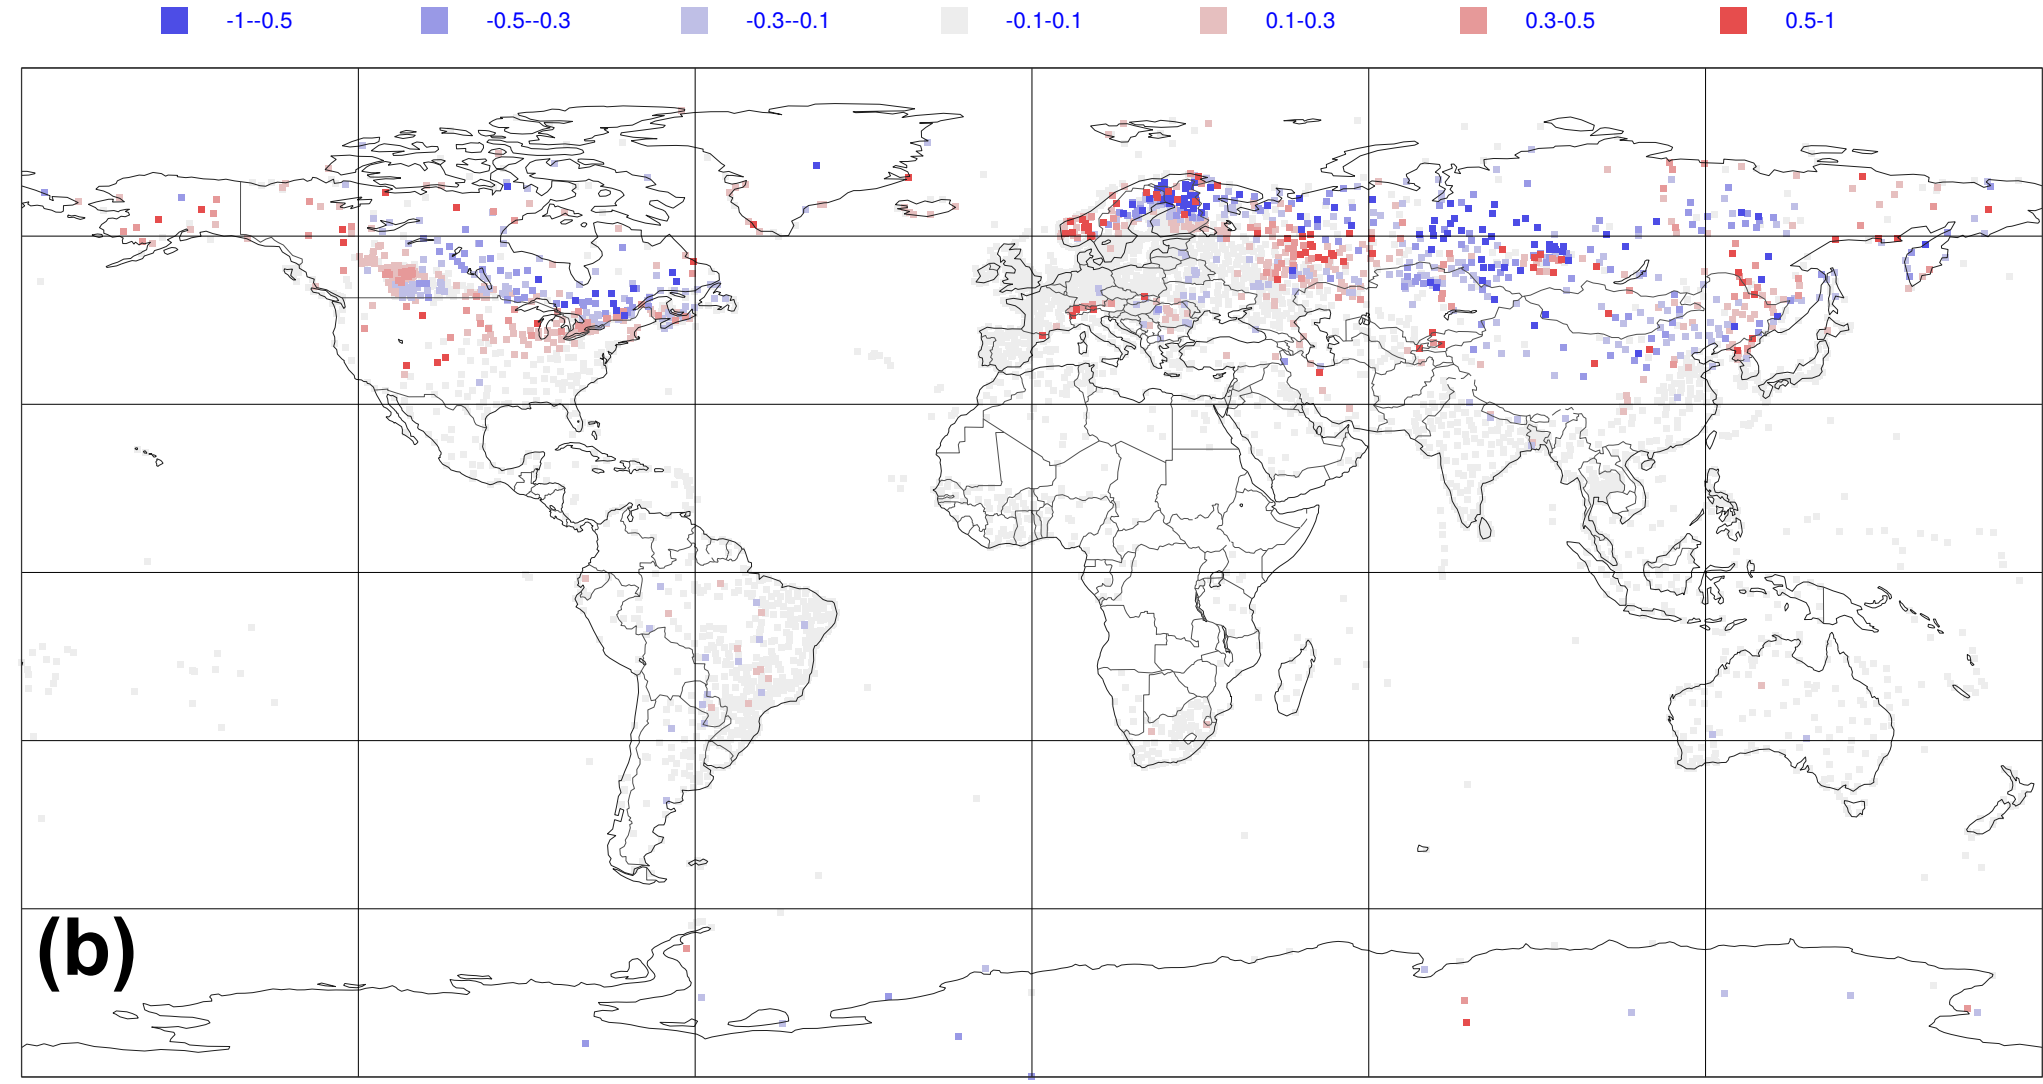

Supplement: Supplementary file 9 [file supplementary]

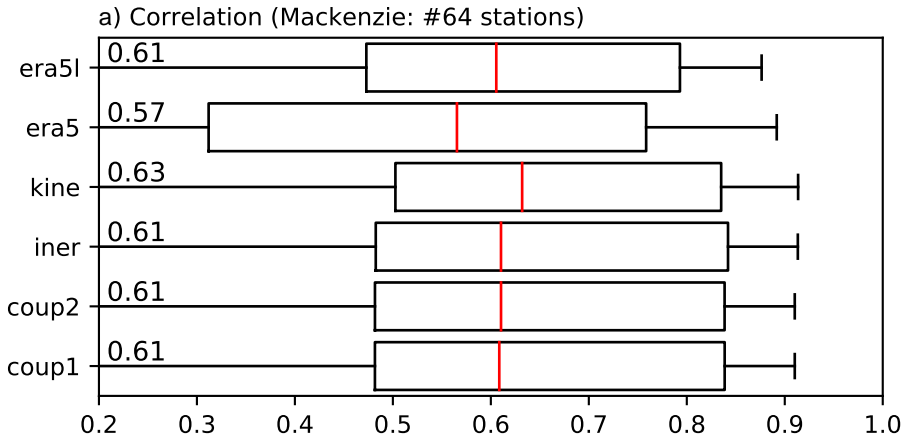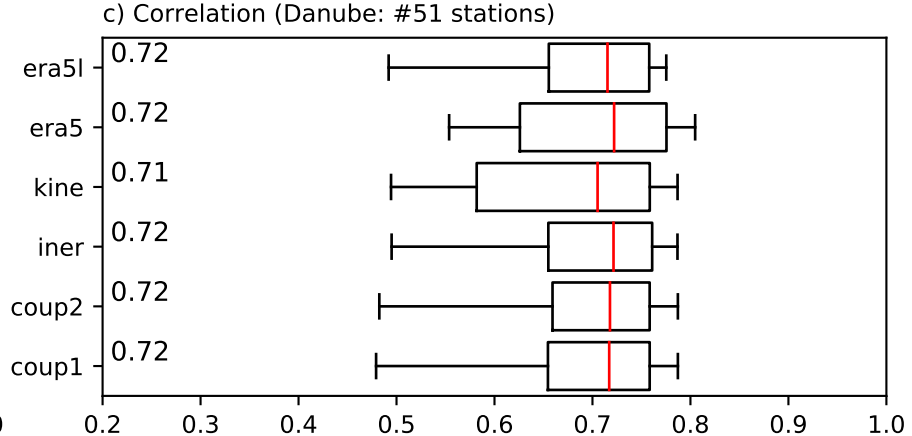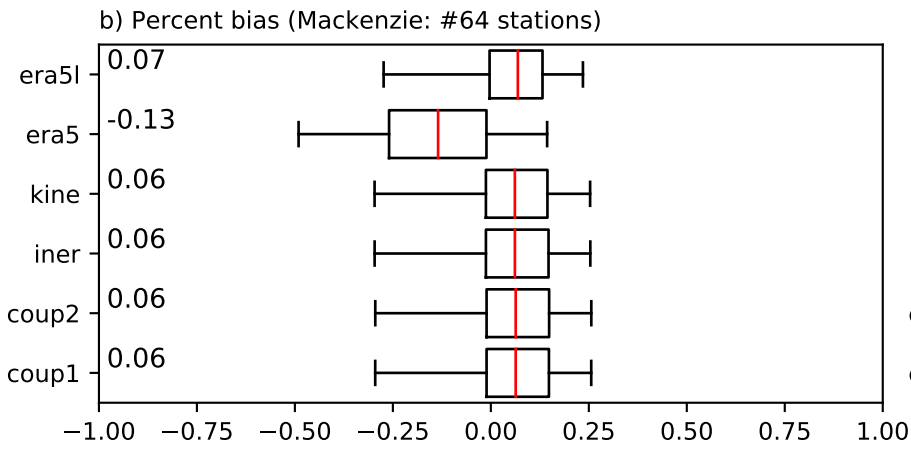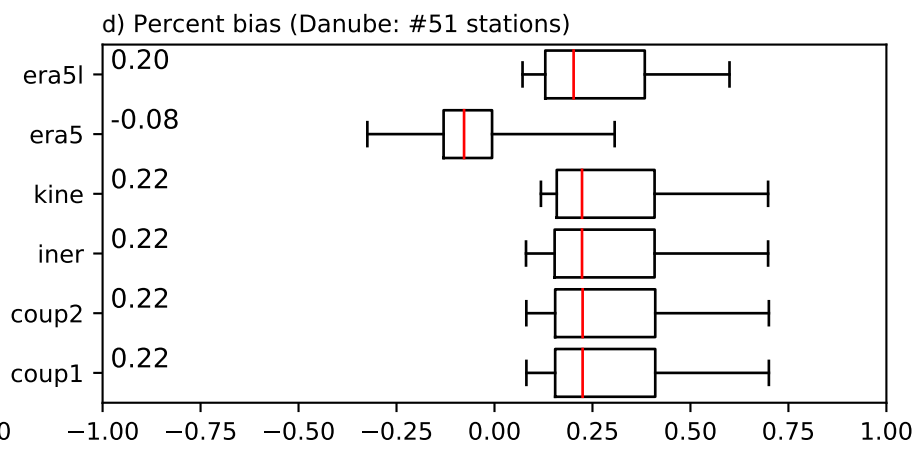

Supplement: Supplementary file 10 [file supplementary]

RMSE(ML5) - RMSE(SL) (cm)

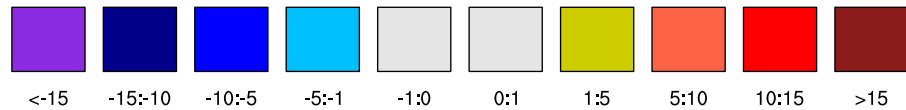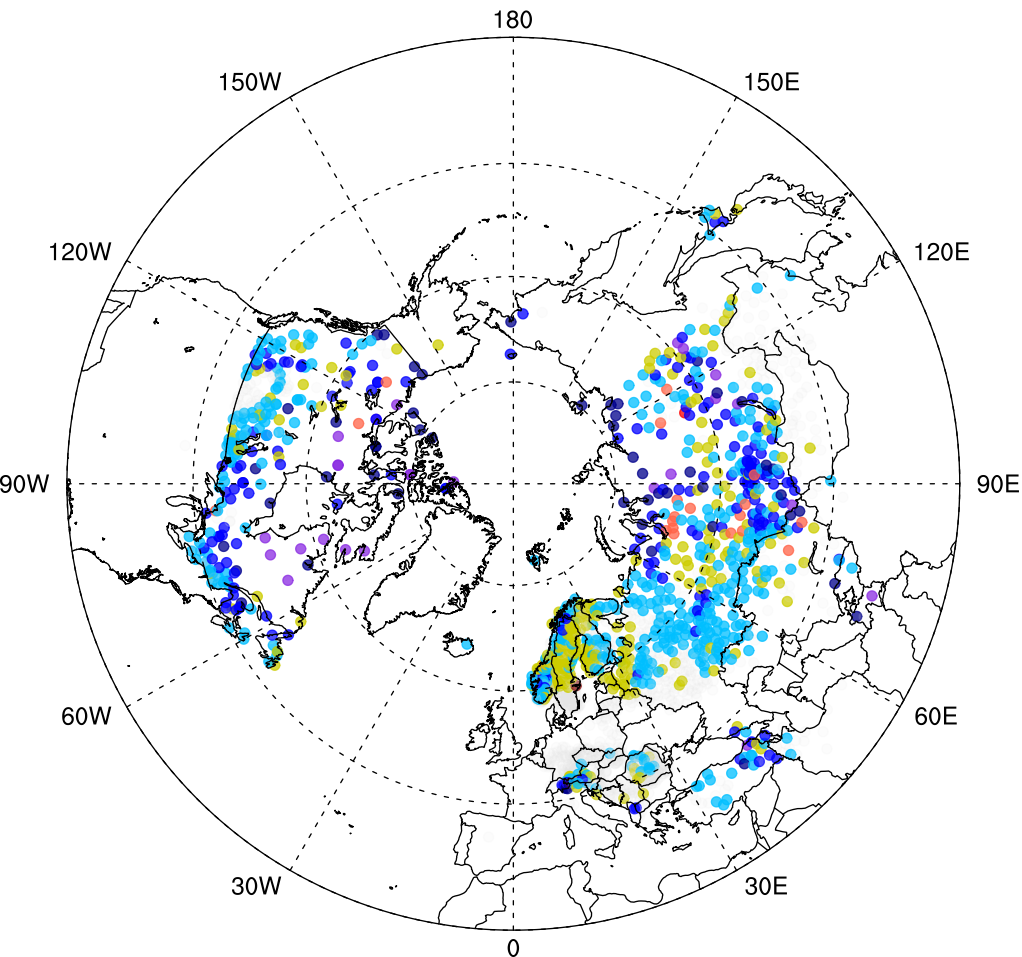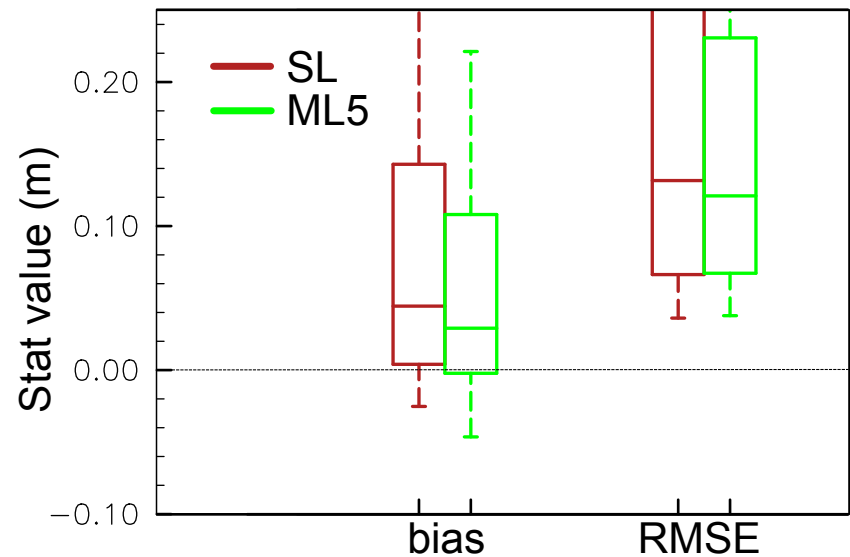

Supplement: Supplementary file 12 [file supplementary]

# Swamp Angel (swa) 2007-2011

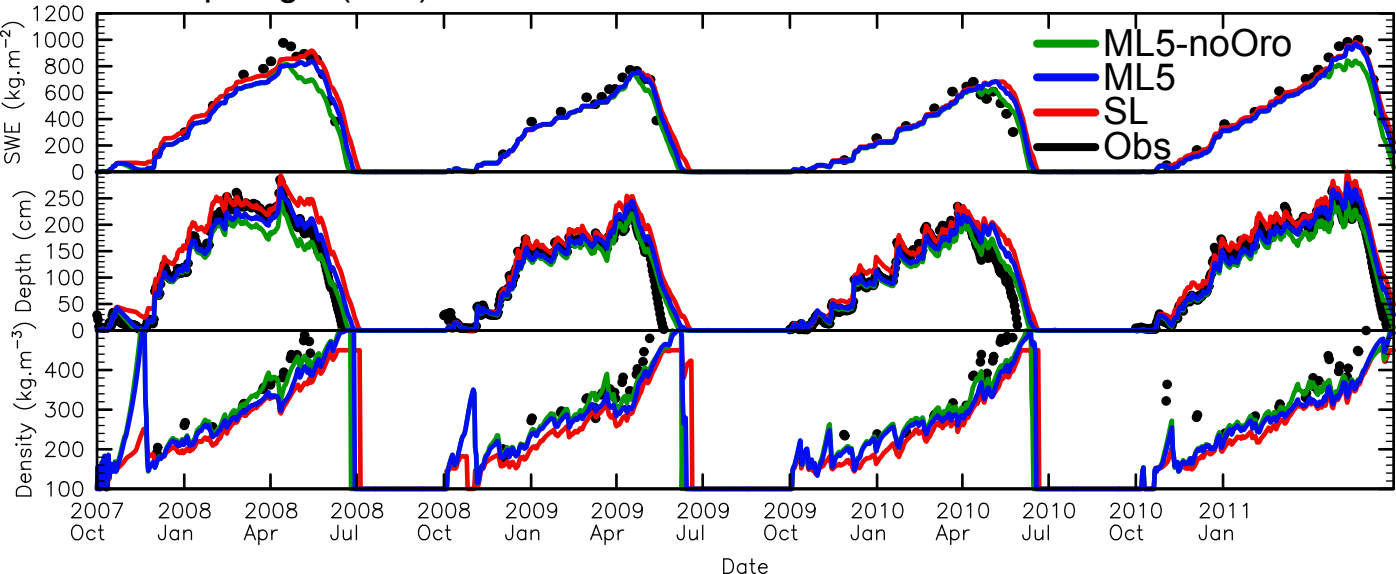

Supplement: Supplementary file 13 [file supplementary]
